# Supplementary material for: Global, regional, and national burden of heart failure and its underlying causes, 1990–2021: results from the global burden of disease study 2021
Source: Springer Nature journal article supplement (doi:10.1186/s40364-025-00728-8), 2025-01-23
Supplement: MOESM1 [file 40364_2025_728_MOESM1_ESM.pdf]

# SUPPLEMENTARY MATERIAL

Supplement to “Global, regional, and national burden of heart failure and its underlying causes, 1990–2021: results from the Global Burden of Disease Study 2021”

## CONTENTS

|                              |    |
|------------------------------|----|
| SUPPLEMENTARY MATERIAL ..... | 1  |
| Figure S1 .....              | 2  |
| Figure S2 .....              | 3  |
| Figure S3 .....              | 4  |
| Figure S4 .....              | 5  |
| Figure S5 .....              | 6  |
| Figure S6 .....              | 7  |
| Figure S7 .....              | 8  |
| Figure S8 .....              | 9  |
| Figure S9 .....              | 10 |
| Figure S10 .....             | 11 |
| Figure S11 .....             | 12 |
| Table S1 .....               | 13 |
| Table S2 .....               | 16 |

**Figure S1**

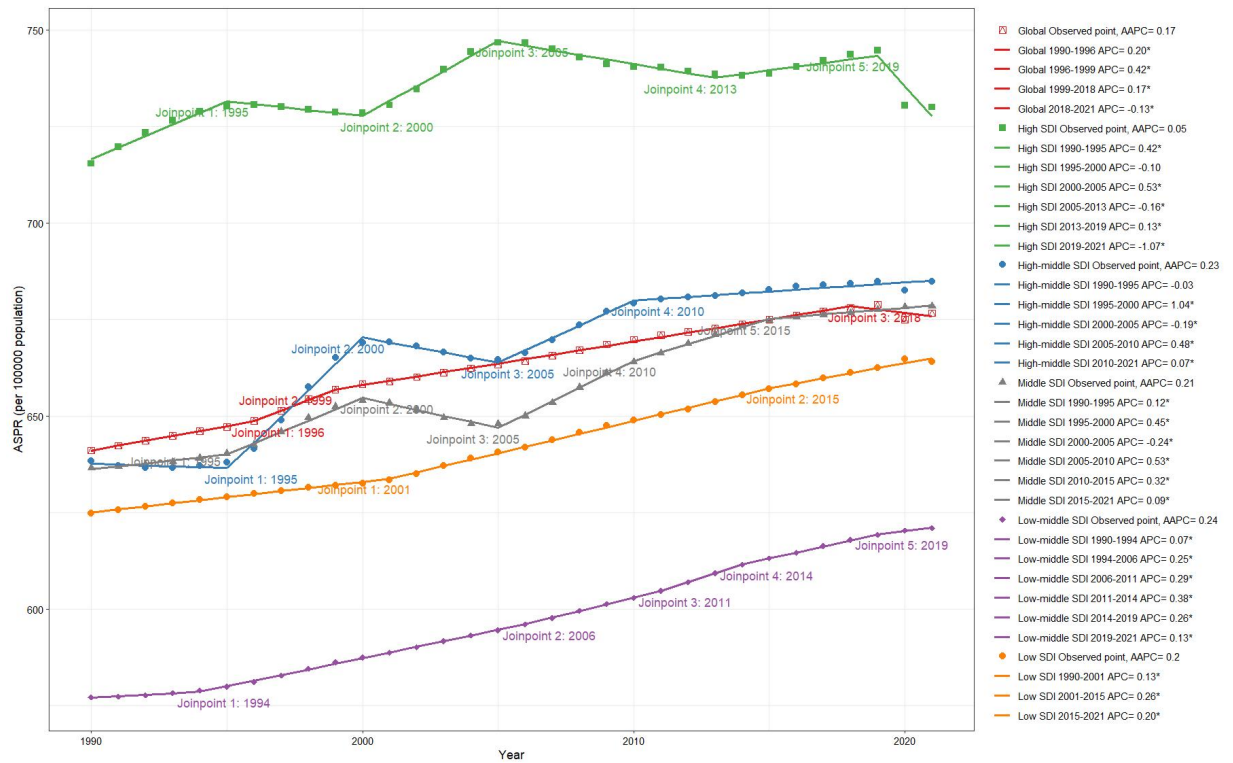

Figure S1: Temporal Trends in ASPR of HF by SDI Regions: A Joinpoint Regression Analysis, 1990-2021

Abbreviations: HF, heart failure; ASPR, age-standardized prevalence rate; SDI, socio-demographic index; APC, annual percent change; AAPC, average annual percent change. \*P<0.05.

**Figure S2**

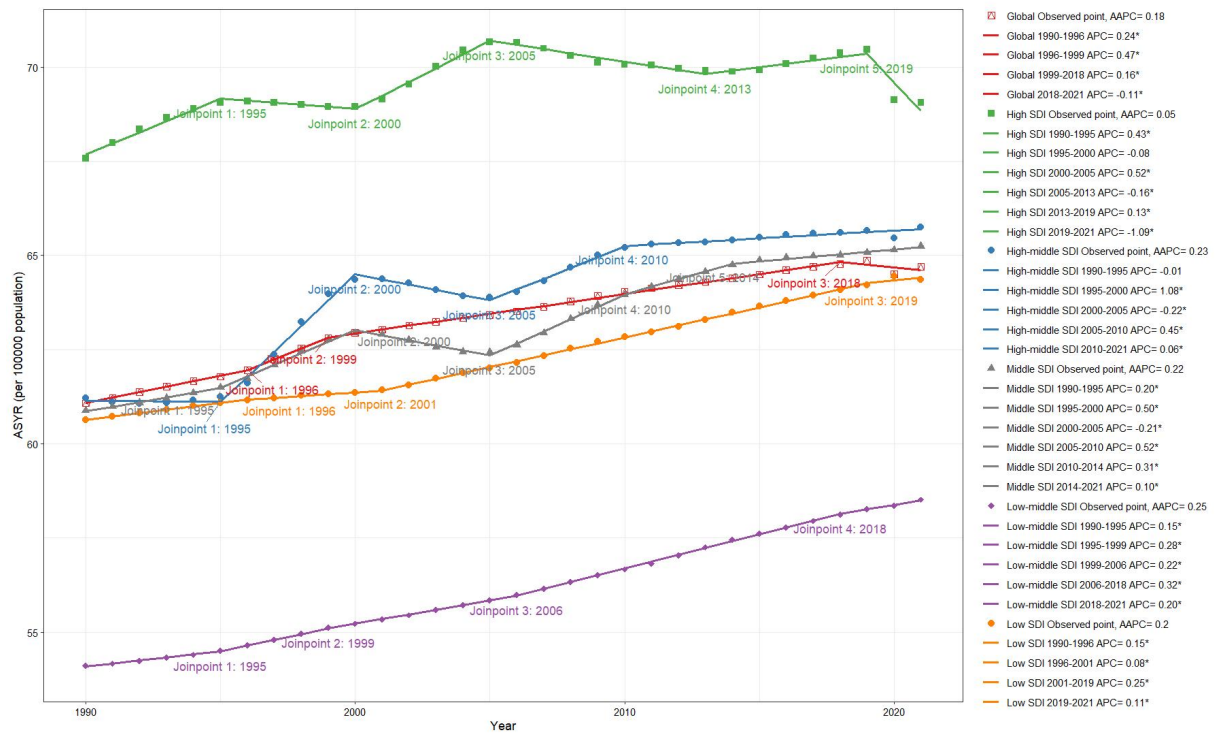

Figure S2: Temporal Trends in ASYR of HF by SDI Regions: A Joinpoint Regression Analysis, 1990-2021

Abbreviations: HF, heart failure; YLDs = years lived with disability; ASYR = age-standardized YLDs rate; SDI, socio-demographic index; APC, annual percent change; AAPC, average annual percent change. \*P<0.05.

**Figure S3**

**A**

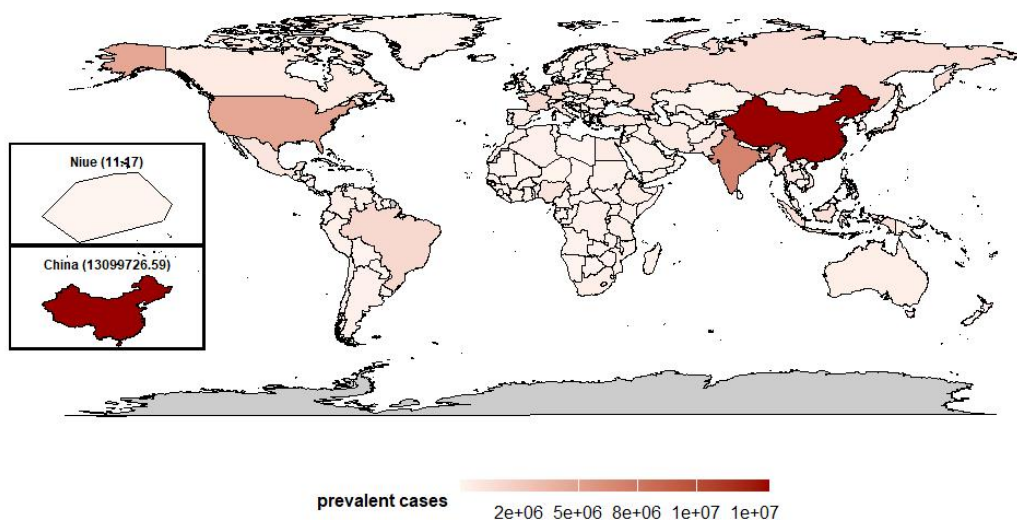

**B**

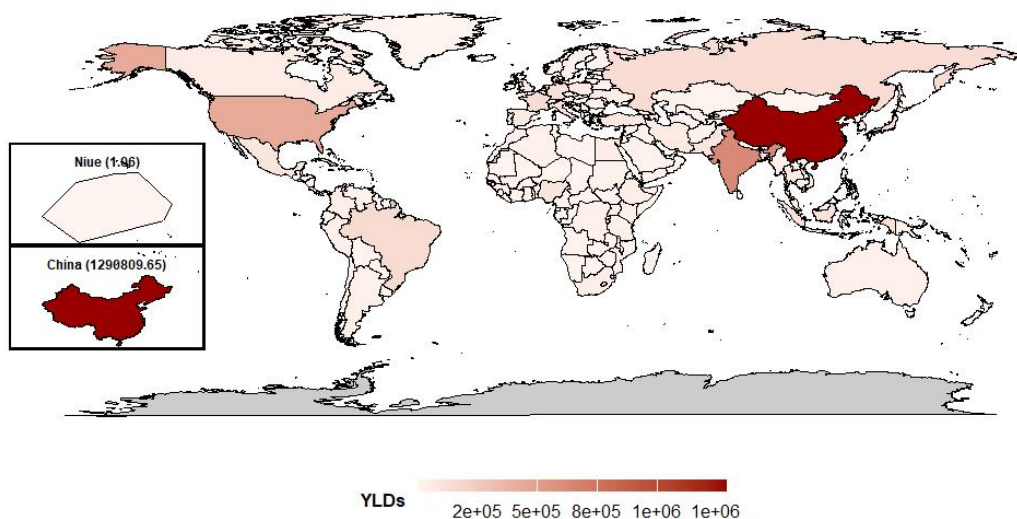

Figure S3: Geographic distributions of heart failure burdens across 204 countries and territories, for both sexes and all ages, 2021

(A) Prevalent cases of heart failure in 2021. Bottom-left small maps display the lowest (Niue) and highest (China) cases. (B) Years Lived with Disability (YLDs) of heart failure in 2021. Bottom-left small maps display the lowest (Niue) and highest (China) YLDs. Note: The legend uses scientific notation, where 'e' represents '10 to the power of'. For example, 2e+06 is equivalent to  $2 \times 10^6$  or 2,000,000.

**Figure S4**

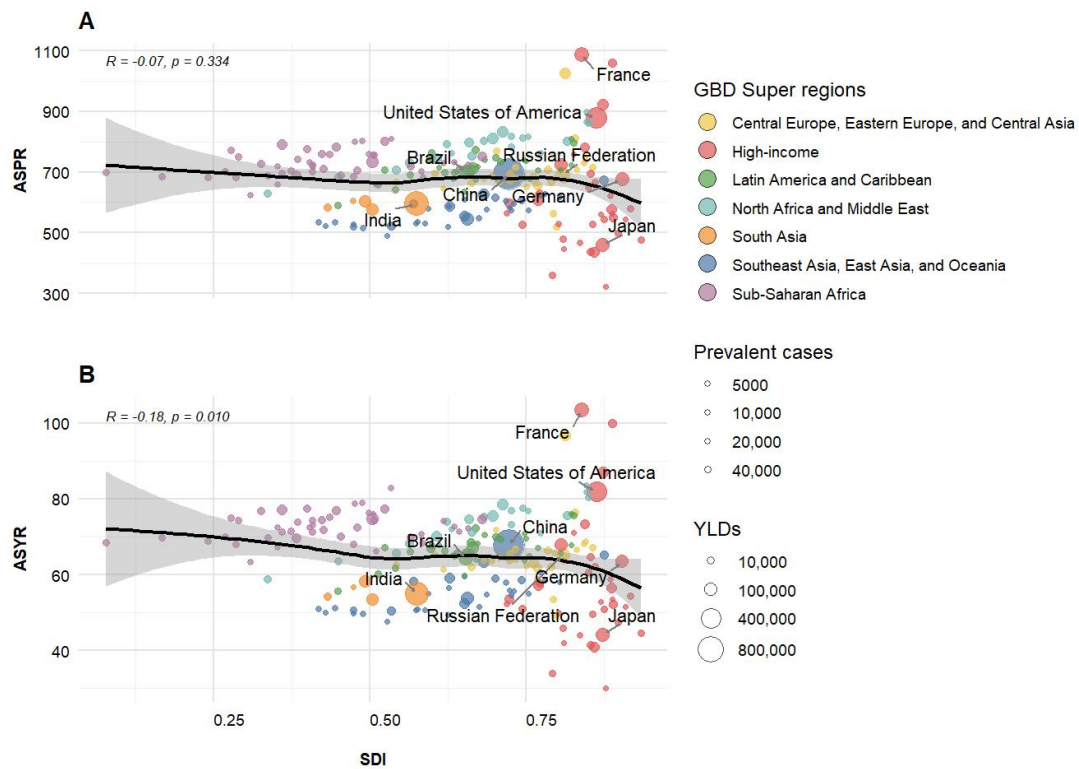

Figure S4: Burdens of heart failure in relation to SDI by 204 countries and territories, for both sexes, 2021

(A) ASPR of heart failure in relation to SDI. (B) ASYR of heart failure in relation to SDI. Note: Each point represents a country. Point size indicates absolute numbers of Prevalence or YLDs as per legend. Colors denote GBD super regions. Labeled countries represent those with the highest disease burden for each metric. Correlation statistics are based on Pearson's correlation test. Abbreviations: SDI = Socio-demographic Index; YLDs = Years Lived with Disability; ASYR = Age-standardized YLDs rate(per 100,000 population); ASPR = age-standardized Prevalence(per 100,000 population); GBD = Global Burden of Disease study.

**Figure S5**

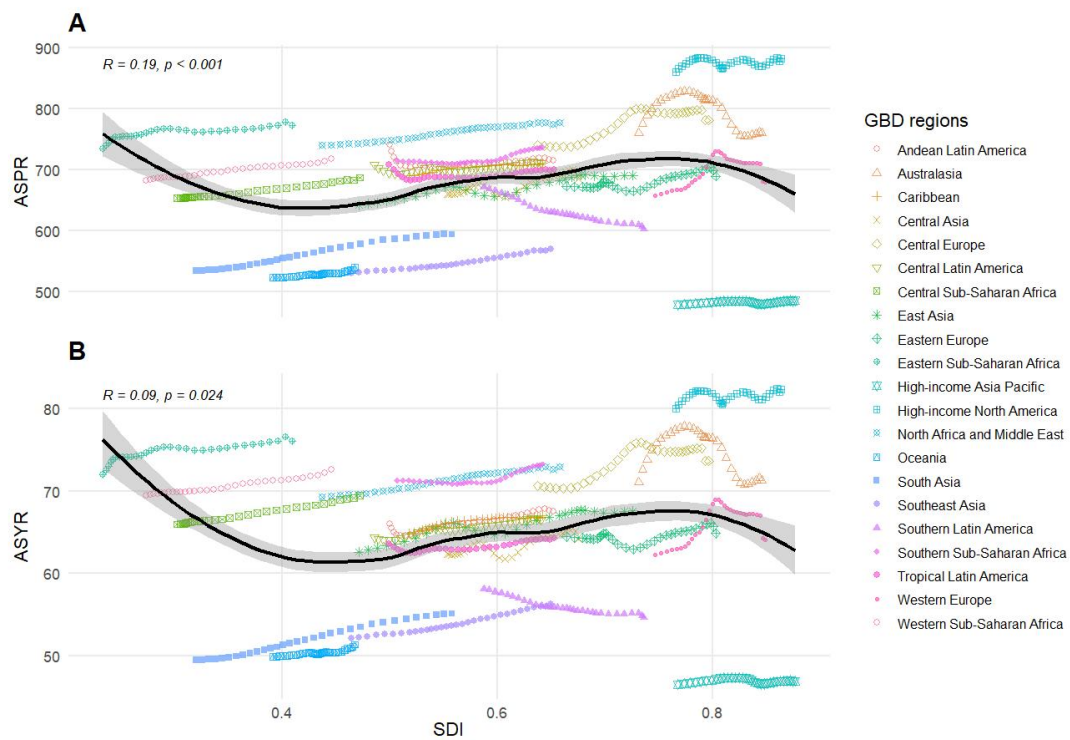

Figure S5: Burdens of heart failure in relation to SDI by 21 GBD regions, for both sexes, 2021

(A) ASPR of heart failure in relation to SDI. (B) ASYR of heart failure in relation to SDI. Note: Each point represents a region-year combination from 1990 to 2021. Colors/shapes denote different GBD regions as per the legend. Black lines represent the overall trend across all data points. R and p values indicate Pearson's correlation coefficients and their statistical significance, respectively. Abbreviations: SDI = Socio-demographic Index; ASPR = age-standardized Prevalence(per 100,000 population); YLDs = Years Lived with Disability; ASYR = age-standardized YLDs rate(per 100,000 population); GBD = Global Burden of Disease study.

**Figure S6**

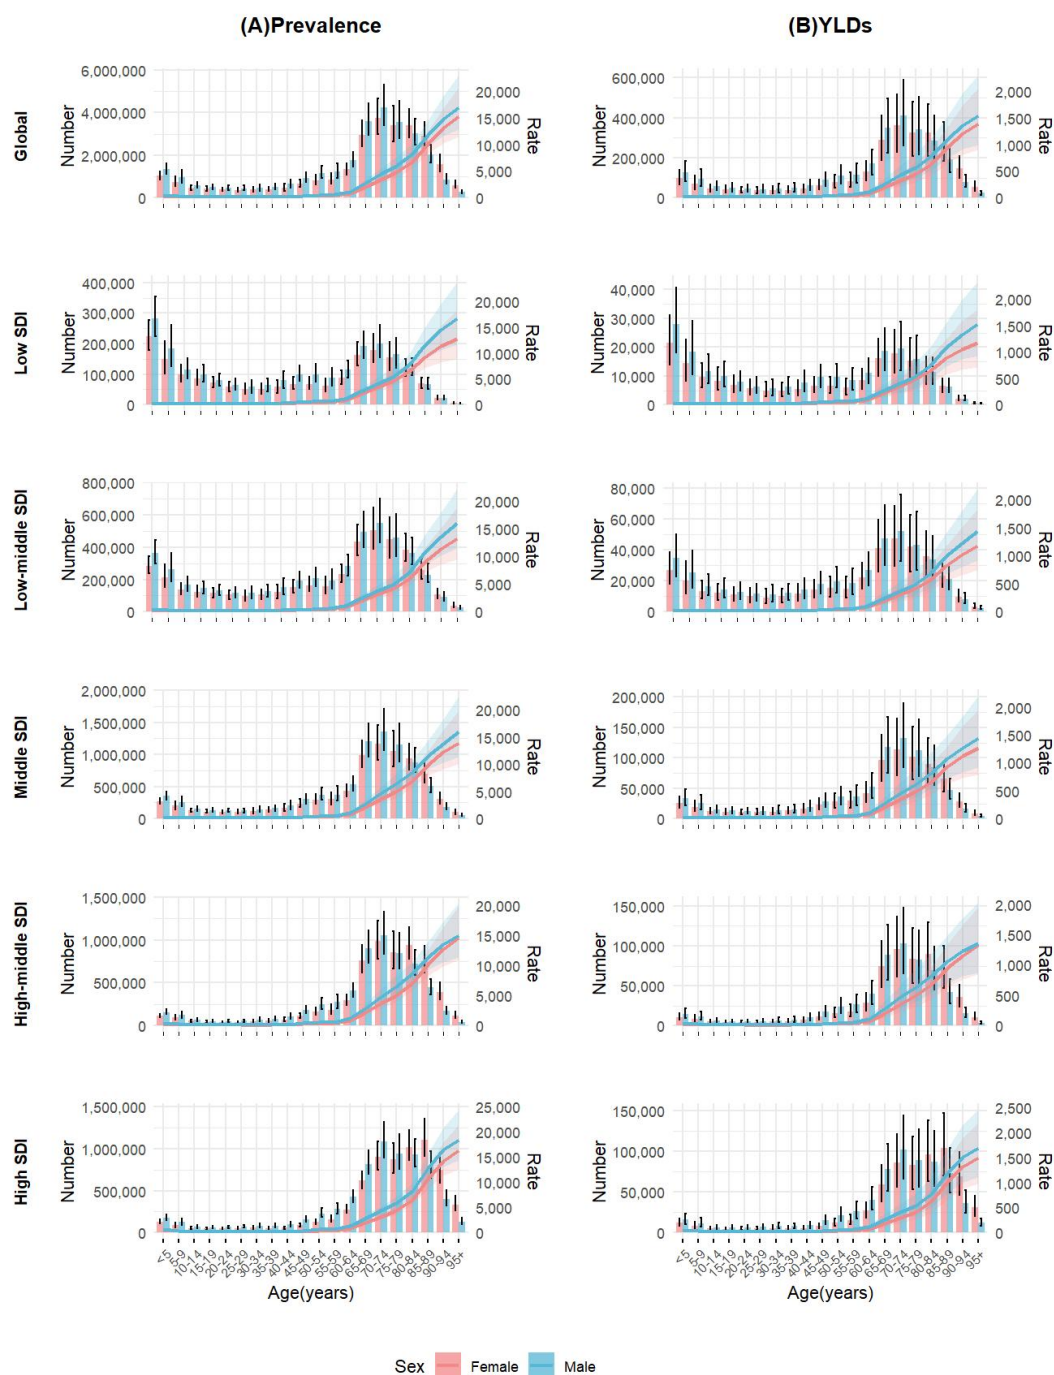

Figure S6: Global and Regional Trends of heart failure Burdens Across Age Groups by Sex, 2021

(A) prevalent cases and prevalence (per 100,000 population) of heart failure across different age groups by sex and SDI region. (B) YLDs and YLDs rate (per 100,000 population) of heart failure across different age groups by sex and SDI region. Note: Bars represent absolute numbers (left y-axis), while lines represent rates per 100,000 population (right y-axis). Vertical black lines indicate 95% uncertainty intervals. Each row represents a different SDI region, from top to bottom: Global, Low SDI, Low-middle SDI, Middle SDI, High-middle SDI, and High SDI. Abbreviations: YLDs = Years Lived with Disability; SDI = Socio-demographic Index.

**Figure S7**

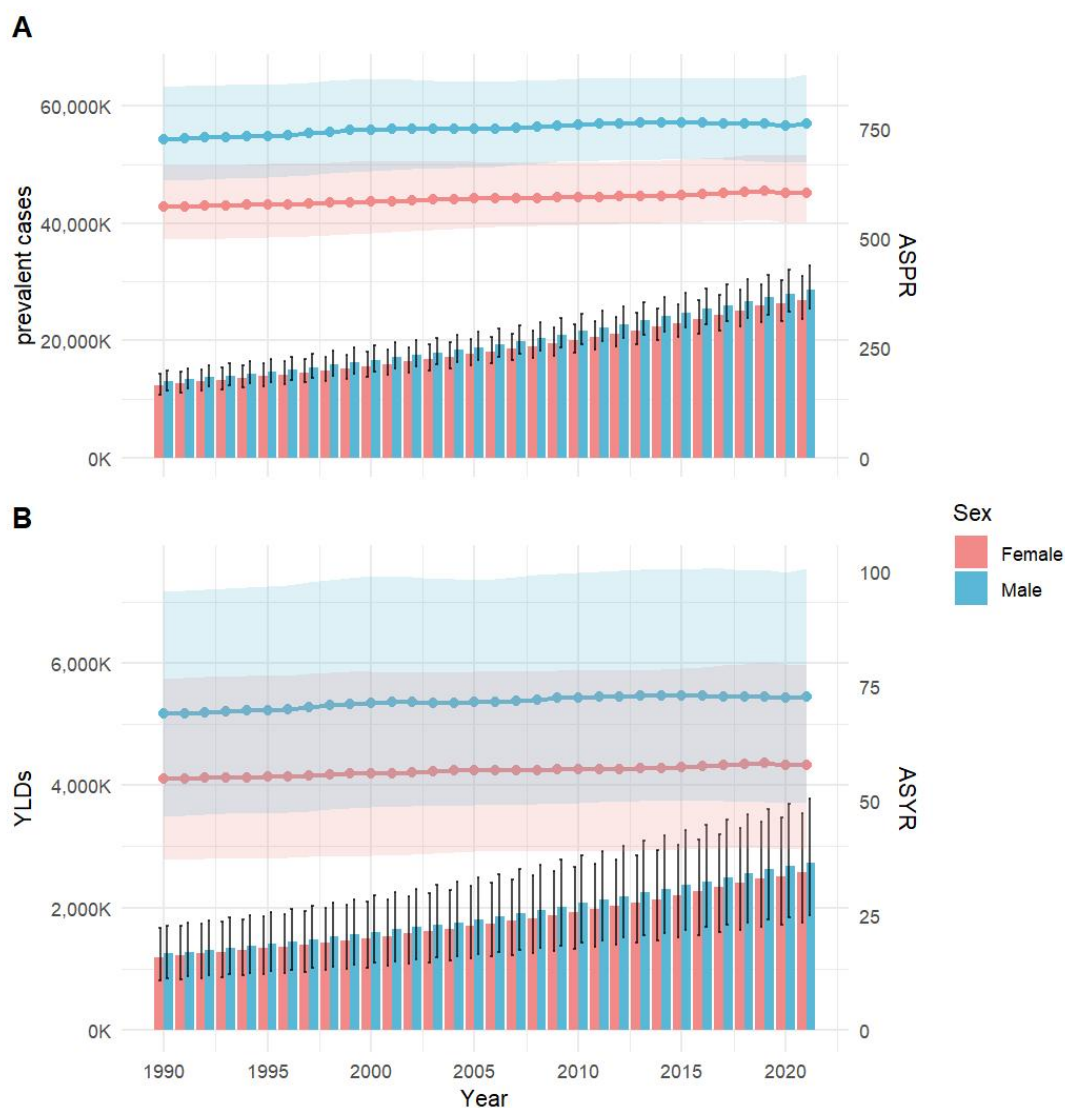

Figure S7: Global Trends of heart failure Burdens by Sex from 1990 to 2020

(A) prevalent cases and ASPR of heart failure by Sex from 1990 to 2020. (B) YLDs and ASYR of heart failure by Sex from 1990 to 2020. Note: Bars represent absolute numbers (left y-axis), while lines represent age-standardized rates per 100,000 population (right y-axis). Pink represents females, blue represents males. Vertical black lines indicate 95% uncertainty intervals. Abbreviations: ASPR = age-standardized Prevalence(per 100,000 population); YLDs = Years Lived with Disability; ASYR = Age-standardised YLDs rate(per 100,000 population).

**Figure S8**

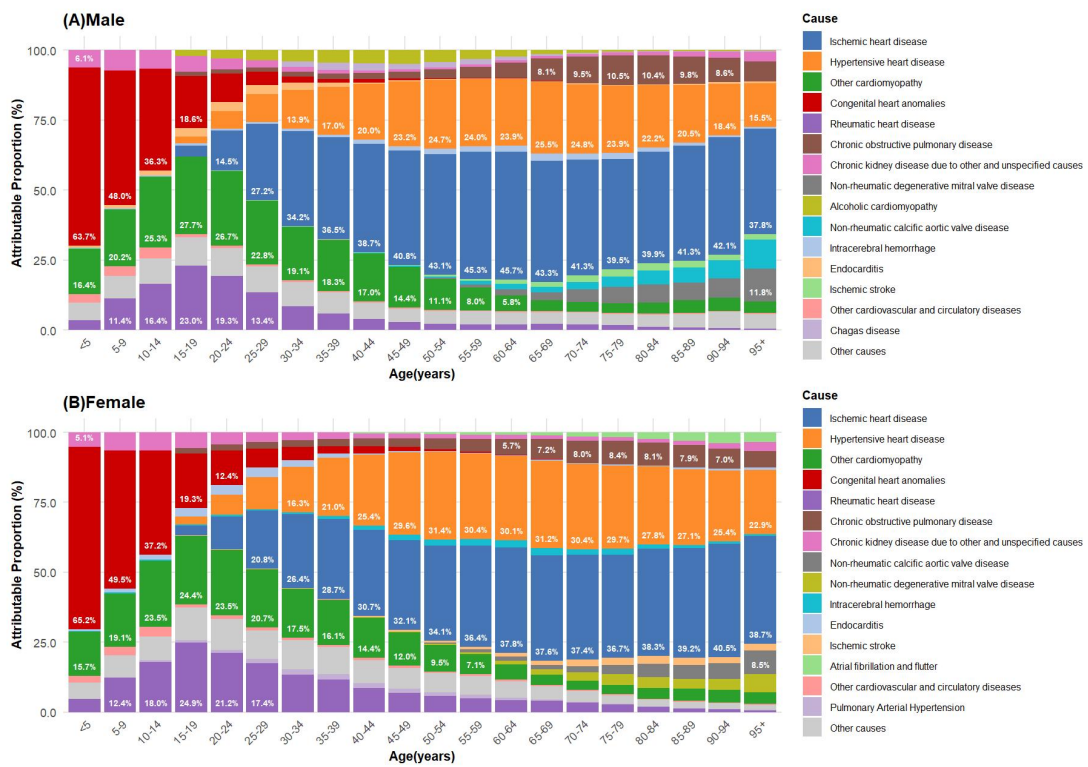

Figure S8: Proportion of heart failure prevalent cases attributable to major underlying causes by sex and age groups globally, 2021

**Figure S9**

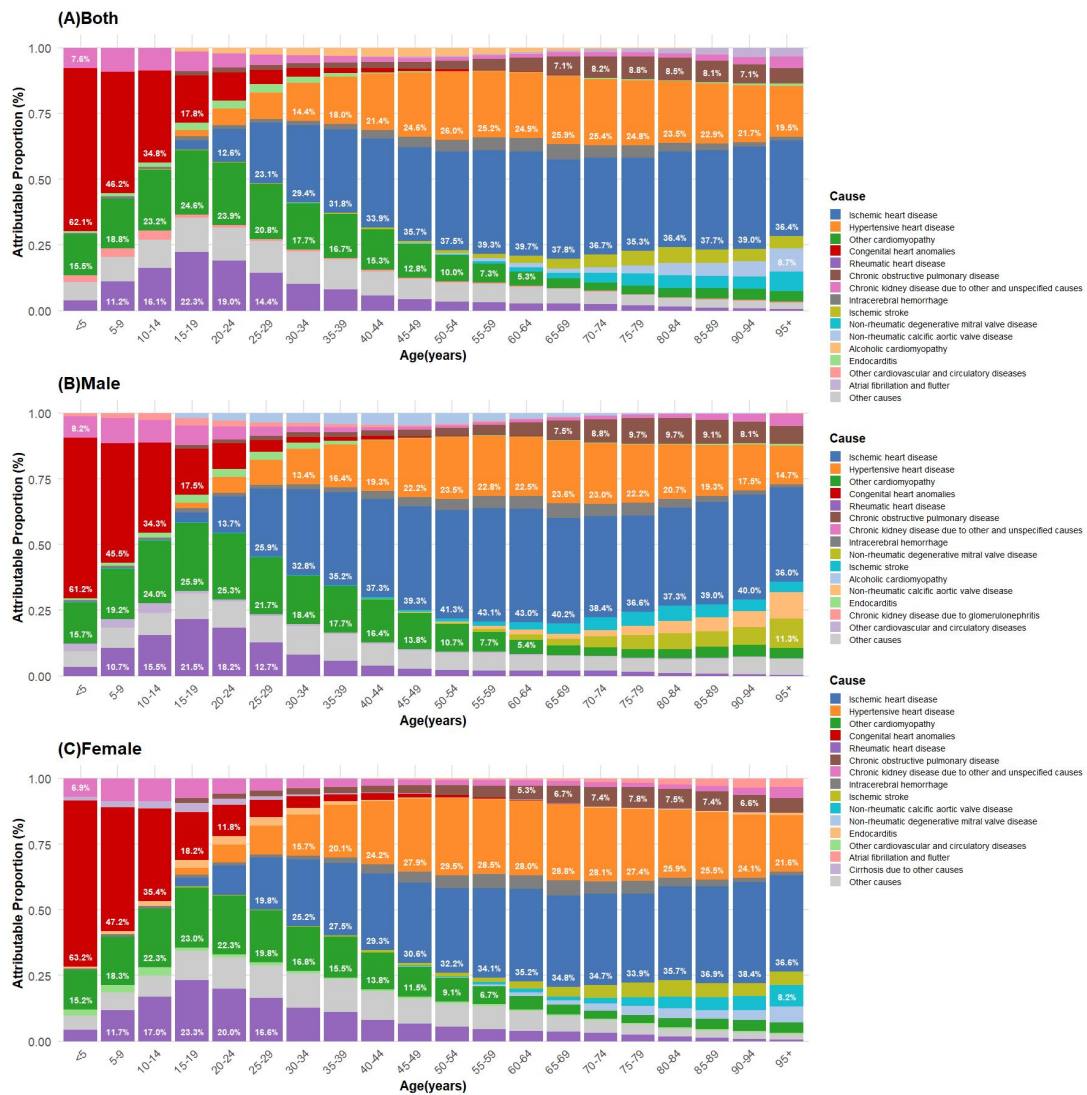

Figure S9: Proportion of YLDs attributable to major underlying causes by sex and age groups globally, 2021

Abbreviations: YLDs = years lived with disability

**Figure S10**

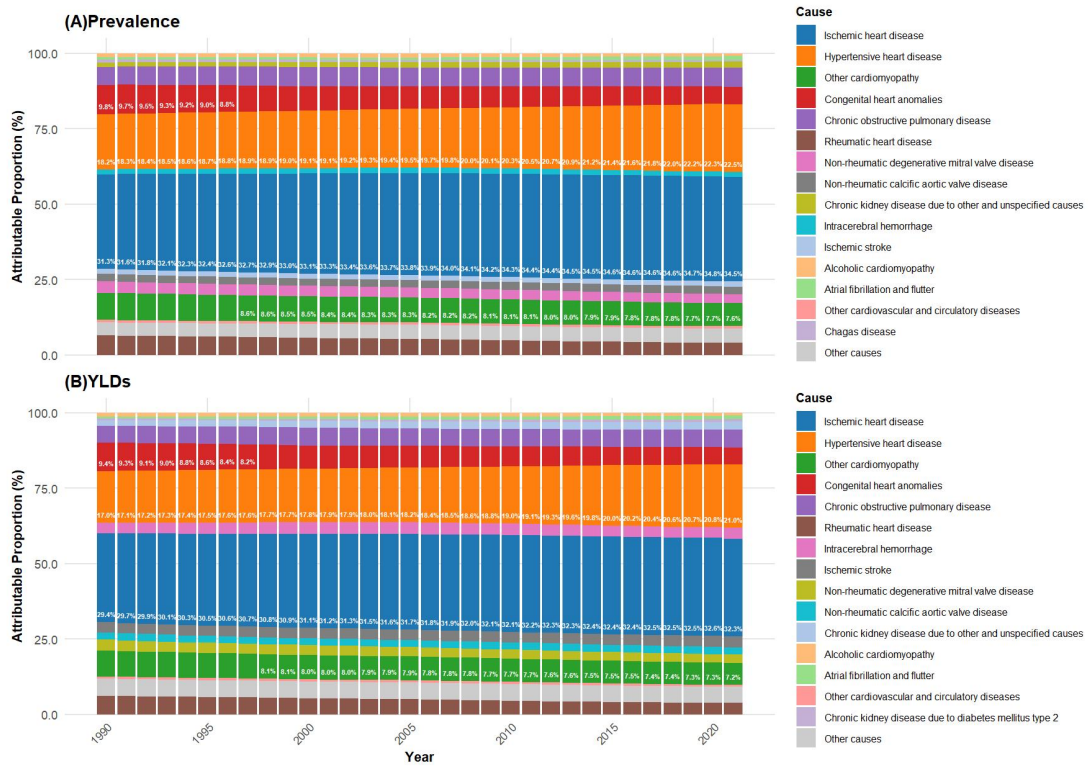

Figure S10: Proportion of heart failure burden attributable to major underlying causes from 1990 to 2020 globally, for both sexes and all ages

Abbreviations: YLDs = years lived with disability

**Figure S11**

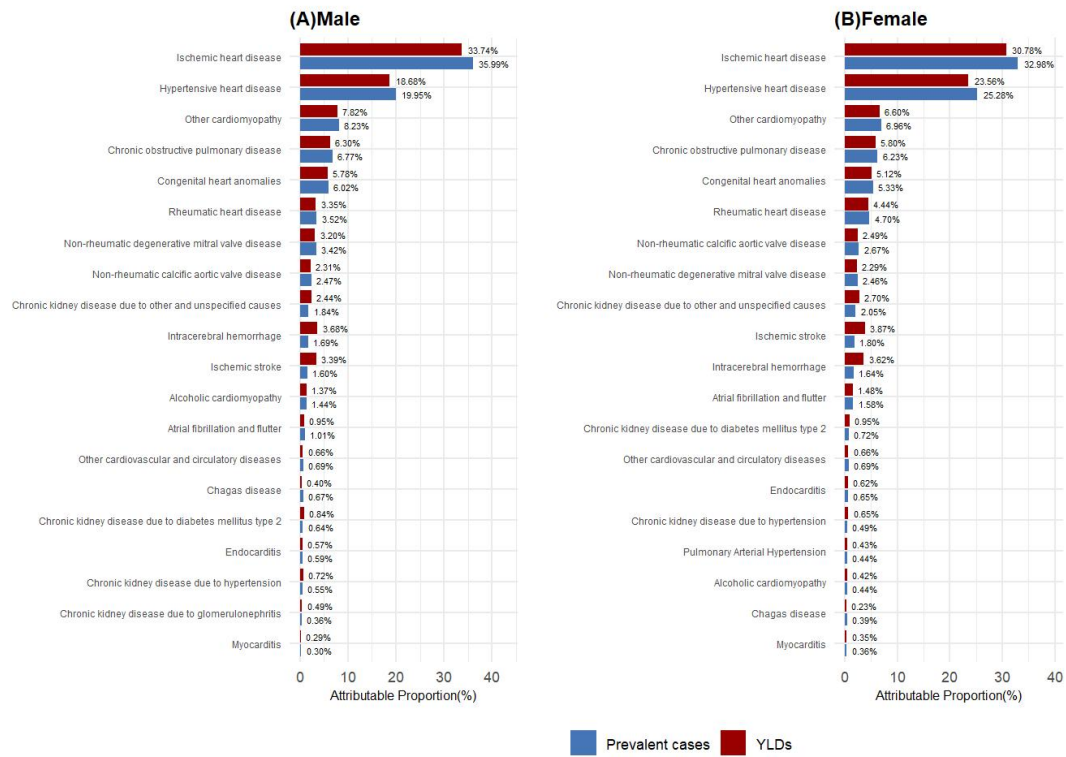

Figure S11: Proportion of heart failure prevalent cases and YLDs attributable to major underlying causes globally by Sex, for all ages, 2021

Abbreviations: YLDs = years lived with disability

# Table S1

Table S1 The prevalence burden of heart failure and its temporal trends by 204 countries and territories, for all ages and both sexes, 1990-2021

|                                  | Prevalent cases (95% UI)  |                           | ASPR (95% UI)            |                          | 1990-2021 EAPC (95% CI) <sup>1</sup> |
|----------------------------------|---------------------------|---------------------------|--------------------------|--------------------------|--------------------------------------|
|                                  | 1990                      | 2021                      | 1990                     | 2021                     |                                      |
| <b>Central Asia</b>              |                           |                           |                          |                          |                                      |
| Armenia                          | 18745 (15788-22425)       | 30353 (25728-36285)       | 721.25 (591.42-875.25)   | 769.96 (660.84-902.72)   | 0.32 (0.26-0.39)                     |
| Azerbaijan                       | 33107 (28173-39184)       | 58117 (49032-69397)       | 653.75 (542.28-796.41)   | 685.59 (577.86-828.31)   | 0.22 (0.18-0.27)                     |
| Georgia                          | 40076 (33409-49617)       | 39968 (33017-49476)       | 707.12 (590.67-868.02)   | 714.52 (604.95-864.68)   | 0.08 (0.03-0.12)                     |
| Kazakhstan                       | 80992 (68476-97428)       | 111376 (94373-134020)     | 656.78 (545.46-809.9)    | 694.78 (583.37-840.29)   | 0.29 (0.24-0.34)                     |
| Kyrgyzstan                       | 21626 (18536-25954)       | 32592 (27674-38597)       | 675.87 (560.92-839.34)   | 697.19 (581.54-843.99)   | 0.16 (0.12-0.2)                      |
| Mongolia                         | 7864 (6744-9261)          | 13717 (11706-16203)       | 620.9 (518.98-769.35)    | 645.43 (542.86-787)      | 0.22 (0.17-0.26)                     |
| Tajikistan                       | 21361 (18161-25114)       | 39081 (33588-45518)       | 649.9 (532.35-793.54)    | 666.05 (557.13-818.61)   | 0.13 (0.08-0.17)                     |
| Turkmenistan                     | 14365 (12205-16691)       | 25147 (21554-29559)       | 658.47 (541.16-806.95)   | 676.78 (569.83-817.86)   | 0.15 (0.11-0.19)                     |
| Uzbekistan                       | 87985 (75680-103040)      | 159100 (135661-187256)    | 638.54 (530.28-794.02)   | 663.55 (553.96-813.78)   | 0.18 (0.14-0.23)                     |
| <b>Central Europe</b>            |                           |                           |                          |                          |                                      |
| Albania                          | 14673 (12563-17081)       | 25637 (21009-31996)       | 656.48 (546.82-788.62)   | 664.37 (560.89-803.71)   | 0.08 (0.06-0.1)                      |
| Bosnia and Herzegovina           | 23884 (20061-28363)       | 35558 (28957-43739)       | 662.67 (557.54-797.95)   | 671.69 (566.32-798.24)   | 0.1 (0.07-0.12)                      |
| Bulgaria                         | 64422 (52440-80347)       | 79115 (63645-100092)      | 628.37 (528.4-759.35)    | 626.81 (532.01-763.07)   | -0.01 (-0.02-0)                      |
| Croatia                          | 29471 (24337-35791)       | 39737 (33529-48151)       | 575.06 (479.94-691.85)   | 519.54 (448.92-606.08)   | -0.57 (-0.76-0.37)                   |
| Czechia                          | 98151 (79520-122021)      | 155040 (125751-192217)    | 789.03 (649.05-952.24)   | 809.05 (685.65-975.53)   | 0.6 (0.34-0.86)                      |
| Hungary                          | 83611 (68986-103301)      | 115490 (93759-142400)     | 649.04 (547.38-776)      | 665.07 (566.96-787.8)    | 0.07 (0.06-0.08)                     |
| Montenegro                       | 3980 (3336-4822)          | 5609 (4556-6940)          | 681.56 (571.57-829.29)   | 677.95 (569.52-812.42)   | 0.02 (0-0.04)                        |
| North Macedonia                  | 10997 (9280-13067)        | 17398 (14001-21769)       | 637.74 (536.69-764.67)   | 648.95 (549.07-783.89)   | 0.08 (0.07-0.09)                     |
| Poland                           | 374933 (328504-431527)    | 673613 (624552-730848)    | 934.6 (823.47-1064.87)   | 1025.57 (957.48-1100.75) | 0.34 (0.24-0.45)                     |
| Romania                          | 157222 (129858-192923)    | 220940 (180713-275453)    | 644.02 (539.93-784.05)   | 655.53 (557.85-788.18)   | 0.34 (0.23-0.46)                     |
| Serbia                           | 51374 (42972-62315)       | 81228 (66552-100851)      | 547.29 (461.39-666.58)   | 563.85 (477.16-670.58)   | -0.38 (-0.58-0.18)                   |
| Slovakia                         | 37028 (30917-44965)       | 55371 (45201-69117)       | 664.7 (563.96-803.22)    | 673.39 (567.7-809.78)    | 0.56 (0.39-0.72)                     |
| Slovenia                         | 15623 (12835-19161)       | 28668 (23874-35778)       | 702.38 (586.56-846.49)   | 727.67 (623.7-871.85)    | 0.18 (0.16-0.21)                     |
| <b>Eastern Europe</b>            |                           |                           |                          |                          |                                      |
| Belarus                          | 80043 (65044-97268)       | 98771 (80936-121649)      | 686.68 (565.86-827)      | 707.58 (593.36-845.92)   | 0.18 (0.13-0.22)                     |
| Estonia                          | 13195 (10902-16192)       | 18476 (15227-23098)       | 709.77 (598.81-855.78)   | 738.48 (622.99-895.78)   | 0.21 (0.18-0.24)                     |
| Latvia                           | 22555 (18323-28597)       | 25909 (21142-32064)       | 694.56 (573.75-853.92)   | 707.93 (604.75-841.19)   | 0.13 (0.09-0.16)                     |
| Lithuania                        | 29609 (24231-36518)       | 37798 (30537-47062)       | 707.18 (588.64-862.2)    | 715.1 (602.41-857.38)    | 0.08 (0.05-0.11)                     |
| Republic of Moldova              | 26084 (21641-31519)       | 35392 (29276-43583)       | 659.36 (545.73-798.32)   | 680.69 (584.91-816.33)   | 0.16 (0.12-0.2)                      |
| Russian Federation               | 1048726 (915634-1211154)  | 1449979 (1264512-1692548) | 665.37 (584.67-758.06)   | 690.56 (611.84-790.29)   | 0.19 (0.15-0.23)                     |
| Ukraine                          | 428151 (365900-503617)    | 458711 (395172-543139)    | 686.59 (599.55-792.24)   | 679.75 (596.33-782.71)   | 0.03 (0-0.07)                        |
| <b>Australasia</b>               |                           |                           |                          |                          |                                      |
| Australia                        | 144777 (121150-178152)    | 329434 (284109-388434)    | 780.58 (661.66-950)      | 781.35 (684.72-905.11)   | -0.21 (-0.35-0.08)                   |
| New Zealand                      | 24686 (21086-29276)       | 49448 (43716-57133)       | 659.62 (568.98-773.52)   | 648.97 (577.88-735)      | -0.2 (-0.29-0.11)                    |
| <b>High-income Asia Pacific</b>  |                           |                           |                          |                          |                                      |
| Brunei Darussalam                | 686 (598-782)             | 1439 (1237-1685)          | 439.6 (374.37-519.2)     | 446.83 (384.65-525.32)   | 0.04 (0.03-0.05)                     |
| Japan                            | 666093 (584110-768886)    | 1404841 (1246526-1601283) | 472.61 (419.41-535.48)   | 459.77 (422.32-503.18)   | -0.13 (-0.15-0.1)                    |
| Republic of Korea                | 151903 (130701-175362)    | 433738 (372555-505417)    | 512.85 (439.07-601.37)   | 576.44 (507.02-657.16)   | 0.44 (0.32-0.57)                     |
| Singapore                        | 11083 (9611-12734)        | 37719 (32117-45001)       | 508.09 (433.41-589.72)   | 529.3 (460.36-616.31)    | 0.14 (0.13-0.14)                     |
| <b>High-income North America</b> |                           |                           |                          |                          |                                      |
| Canada                           | 273024 (232426-322633)    | 593733 (485413-721562)    | 887.88 (762.35-1038.35)  | 922.09 (779-1093.16)     | 0.14 (0.03-0.25)                     |
| Greenland                        | 249 (214-290)             | 417 (348-501)             | 737.66 (610.22-873.27)   | 757.37 (644.08-901.24)   | 0.12 (0.11-0.14)                     |
| United States of America         | 2605839 (2302375-2996268) | 4616875 (4290102-4976907) | 857.89 (764.58-973.38)   | 877.27 (820.75-942.99)   | -0.01 (-0.04-0.02)                   |
| <b>Southern Latin America</b>    |                           |                           |                          |                          |                                      |
| Argentina                        | 215098 (183457-254926)    | 315729 (267550-373641)    | 683.09 (586.4-809.52)    | 595.06 (510.57-699.1)    | -0.42 (-0.45-0.39)                   |
| Chile                            | 70434 (60047-81923)       | 146798 (124044-174737)    | 667.46 (565.91-787.95)   | 629.29 (538.46-736.29)   | -0.12 (-0.15-0.09)                   |
| Uruguay                          | 20854 (17564-24979)       | 29305 (24346-35189)       | 573.34 (488.97-675.25)   | 564.22 (483.49-658.69)   | -0.04 (-0.05-0.03)                   |
| <b>Western Europe</b>            |                           |                           |                          |                          |                                      |
| Andorra                          | 279 (230-338)             | 757 (617-927)             | 556.32 (465.09-669.55)   | 561.35 (475.71-665.2)    | 0 (-0.02-0.01)                       |
| Austria                          | 105813 (87985-119972)     | 121624 (104383-137200)    | 933.17 (797.82-1042.92)  | 694.44 (615.37-768.17)   | -1.3 (-1.44-1.16)                    |
| Belgium                          | 66932 (54722-83237)       | 91808 (81989-108223)      | 485.42 (410.52-583.73)   | 435.4 (392-499.63)       | 0.01 (-0.1-0.11)                     |
| Cyprus                           | 3219 (2665-3897)          | 8411 (6891-10315)         | 439.42 (371-525.02)      | 465.59 (394.39-554.11)   | -0.28 (-0.45-0.1)                    |
| Denmark                          | 33608 (27708-41231)       | 53563 (43756-66672)       | 458.9 (388.68-547.76)    | 498.93 (421.36-599.93)   | 0.4 (0.17-0.62)                      |
| Finland                          | 41944 (34533-50065)       | 78820 (62803-97021)       | 651.76 (551.43-761.37)   | 667.2 (560.12-788.78)    | 0.12 (-0.09-0.33)                    |
| France                           | 832153 (681311-1027886)   | 1505424 (1234606-1840699) | 1052.24 (881.14-1271.73) | 1085.7 (920.21-1284.19)  | 0.01 (-0.11-0.14)                    |
| Germany                          | 729402 (601508-891774)    | 1219790 (989142-1489906)  | 642.98 (542.98-761.84)   | 675.91 (574.85-799.7)    | 0.97 (0.68-1.25)                     |
| Greece                           | 59375 (48597-72678)       | 75336 (64320-89209)       | 449.03 (376.8-532.01)    | 359.14 (318.53-409.36)   | -1.18 (-1.35-1)                      |
| Iceland                          | 899 (751-1070)            | 1678 (1374-2048)          | 320.44 (268.75-376.57)   | 322.43 (273.53-384.22)   | -0.17 (-0.35-0.01)                   |
| Ireland                          | 20258 (16786-24448)       | 39074 (32348-47555)       | 519.55 (435.56-618.43)   | 543.48 (460.97-649.95)   | 0.15 (0.15-0.16)                     |
| Israel                           | 21937 (18257-26503)       | 58945 (49094-71446)       | 453.13 (378.74-547.68)   | 478.23 (403.68-569.75)   | 0.13 (0.06-0.21)                     |
| Italy                            | 549809 (479260-636523)    | 1015901 (916641-1137019)  | 703.57 (624.26-797.33)   | 723.4 (661.02-796.44)    | 0.25 (0.01-0.5)                      |
| Luxembourg                       | 2868 (2367-3541)          | 5955 (4903-7290)          | 595.9 (500.71-715.41)    | 619.03 (526.62-745.52)   | -0.1 (-0.45-0.26)                    |
| Malta                            | 1984 (1650-2429)          | 4679 (3795-5782)          | 515.43 (432.09-623.24)   | 529.11 (450.23-627.36)   | 0.55 (0.38-0.73)                     |
| Monaco                           | 334 (268-416)             | 480 (384-597)             | 531.01 (447.43-638.45)   | 543.17 (466.55-643.76)   | 0.05 (0.05-0.06)                     |
| Netherlands                      | 93206 (79296-111830)      | 172714 (138771-211000)    | 502.65 (435.33-589.98)   | 548.9 (458.01-645.03)    | 0.18 (0.08-0.28)                     |
| Norway                           | 36089 (31619-41846)       | 53116 (46224-61799)       | 565.52 (500.98-640.31)   | 580.53 (519.04-661.13)   | 0.1 (0.09-0.11)                      |
| Portugal                         | 59923 (48947-73957)       | 119946 (97771-147918)     | 490.95 (413.34-589.19)   | 523.97 (446.43-624.87)   | 0.07 (0.01-0.13)                     |
| San Marino                       | 180 (147-224)             | 404 (329-507)             | 557 (469.33-673.49)      | 562.49 (476.55-682.09)   | 0 (-0.01-0.02)                       |
| Spain                            | 265377 (213848-329168)    | 558756 (503070-612934)    | 538.55 (448.49-648.26)   | 607.61 (549.73-664.94)   | 0.07 (-0.03-0.18)                    |
| Sweden                           | 136679 (118569-159093)    | 219066 (187827-258314)    | 1026.82 (910.64-1160.91) | 1060.21 (936.14-1219.74) | -0.01 (-0.09-0.07)                   |
| Switzerland                      | 44620 (36248-55017)       | 79865 (65124-98653)       | 464.47 (388.13-556.71)   | 477.03 (404.96-569.62)   | 0.38 (0.1-0.67)                      |
| United Kingdom                   | 359495 (308145-427729)    | 500717 (435455-583119)    | 436.63 (379.96-504.56)   | 436.47 (389.38-493.55)   | -0.17 (-0.22-0.11)                   |

TableS1(continued)

|                                       |                           |                              |                          |                         |                    |
|---------------------------------------|---------------------------|------------------------------|--------------------------|-------------------------|--------------------|
| <b>Andean Latin America</b>           |                           |                              |                          |                         |                    |
| Bolivia (Plurinational State of)      | 37109 (30096-46423)       | 70160 (59358-83240)          | 1005.64 (798.12-1265.05) | 765.32 (645.99-910.43)  | -0.65 (-0.75-0.56) |
| Ecuador                               | 44408 (38044-51050)       | 113899 (96850-135561)        | 709.13 (597.52-843.1)    | 697.09 (590.96-837.76)  | 0.04 (0-0.08)      |
| Peru                                  | 95222 (82643-109062)      | 239199 (201461-282341)       | 685.07 (582.4-811.74)    | 709.27 (594.37-843.34)  | 0.19 (0.17-0.21)   |
| <b>Caribbean</b>                      |                           |                              |                          |                         |                    |
| Antigua and Barbuda                   | 427 (353-508)             | 679 (561-826)                | 726.07 (600.58-858.23)   | 735.66 (619.48-882.51)  | -0.02 (-0.06-0.02) |
| Bahamas                               | 1141 (974-1340)           | 2489 (2081-3013)             | 669.69 (560.46-795.89)   | 706.84 (594.65-854.22)  | 0.17 (0.16-0.18)   |
| Barbados                              | 2077 (1708-2580)          | 3347 (2770-4132)             | 695.99 (585.12-842.04)   | 740.14 (630.35-888.58)  | 0.18 (0.17-0.19)   |
| Belize                                | 829 (715-966)             | 2145 (1832-2506)             | 681.47 (575.17-825.67)   | 715.1 (601.56-862.19)   | 0.15 (0.15-0.16)   |
| Bermuda                               | 428 (353-515)             | 976 (791-1204)               | 744.64 (620.23-887.56)   | 810.64 (685.09-968.67)  | 0.27 (0.25-0.29)   |
| Cuba                                  | 75035 (61777-91803)       | 134801 (109120-163808)       | 740.05 (611.44-900.81)   | 771.68 (646.94-917.03)  | 0.14 (0.13-0.14)   |
| Dominica                              | 417 (351-502)             | 502 (419-606)                | 647.36 (539.53-783.75)   | 678.97 (576.65-813.53)  | 0.13 (0.12-0.14)   |
| Dominican Republic                    | 28969 (24874-33588)       | 69361 (58703-83822)          | 672.92 (559.09-805.23)   | 699.6 (589.97-850.3)    | 0.1 (0.08-0.13)    |
| Grenada                               | 540 (451-653)             | 670 (562-817)                | 638.28 (530.27-774.47)   | 673.77 (574.41-813.19)  | 0.12 (0.1-0.14)    |
| Guyana                                | 2754 (2345-3222)          | 3759 (3184-4514)             | 604.25 (501.21-745.26)   | 633.41 (529.89-764.58)  | 0.13 (0.12-0.14)   |
| Haiti                                 | 19302 (16184-22634)       | 42722 (36545-50129)          | 553.16 (449.37-681.45)   | 589.28 (493.53-716)     | 0.2 (0.18-0.21)    |
| Jamaica                               | 14536 (12353-17474)       | 22420 (18681-27512)          | 710.74 (596.82-861.74)   | 740.26 (622.43-899.43)  | 0.08 (0.05-0.12)   |
| Puerto Rico                           | 26885 (22119-32340)       | 54095 (43986-67695)          | 749.51 (622.33-893.5)    | 795.44 (666.26-962.81)  | 0.2 (0.19-0.21)    |
| Saint Kitts and Nevis                 | 253 (210-314)             | 375 (312-452)                | 625.8 (522.46-770.65)    | 677.48 (571.26-808.86)  | 0.25 (0.23-0.27)   |
| Saint Lucia                           | 684 (574-810)             | 1519 (1269-1852)             | 671.1 (566.58-804.57)    | 716.73 (606.05-861.36)  | 0.2 (0.19-0.22)    |
| Saint Vincent and the Grenadines      | 542 (456-644)             | 900 (739-1096)               | 655.47 (540.81-795.79)   | 701 (586.54-843.08)     | 0.21 (0.2-0.21)    |
| Suriname                              | 1778 (1499-2083)          | 3915 (3271-4701)             | 657.38 (545.55-789.73)   | 677.08 (569.47-815.55)  | 0.08 (0.07-0.09)   |
| Trinidad and Tobago                   | 6072 (5109-7199)          | 12129 (9932-14708)           | 666.94 (556.41-808.86)   | 705.6 (587.67-842.52)   | 0.19 (0.18-0.2)    |
| United States Virgin Islands          | 551 (461-654)             | 1165 (945-1459)              | 680.29 (569.46-821.53)   | 724.2 (614.06-867.03)   | 0.17 (0.16-0.18)   |
| <b>Central Latin America</b>          |                           |                              |                          |                         |                    |
| Colombia                              | 135194 (116775-155292)    | 375912 (315705-457086)       | 671.91 (563.74-803.2)    | 706.42 (598.72-853.71)  | 0.19 (0.18-0.2)    |
| Costa Rica                            | 15564 (13454-17943)       | 38732 (32509-46528)          | 741.29 (629.6-878.04)    | 747.41 (632.96-887.34)  | 0.07 (0.06-0.09)   |
| El Salvador                           | 24134 (20882-27738)       | 45087 (37828-54705)          | 681.01 (577.14-807.43)   | 691.73 (578.98-839.97)  | 0.12 (0.11-0.14)   |
| Guatemala                             | 28662 (24586-33293)       | 74786 (63935-88169)          | 652.76 (552.87-786.42)   | 643.15 (545.44-773.02)  | 0.04 (0.01-0.08)   |
| Honduras                              | 17806 (15447-20364)       | 44256 (37681-51988)          | 672.1 (560.58-800.75)    | 657.44 (551.11-788.78)  | 0.01 (-0.02-0.03)  |
| Mexico                                | 366966 (328042-407908)    | 853851 (758489-969748)       | 717.65 (636.15-814.22)   | 712.68 (634.91-808.15)  | 0.01 (-0.02-0.05)  |
| Nicaragua                             | 15013 (13081-17111)       | 35630 (30371-41783)          | 710.1 (605.05-851.66)    | 705.89 (597.59-841.38)  | 0.05 (0.02-0.07)   |
| Panama                                | 12187 (10388-14362)       | 32356 (27691-38417)          | 728.81 (608.02-883.98)   | 733.93 (626-870.33)     | 0.06 (0.04-0.07)   |
| Venezuela (Bolivarian Republic of)    | 87502 (75855-100532)      | 207335 (174793-246713)       | 762.46 (651.38-898.45)   | 744.74 (631.2-885.39)   | 0.02 (-0.01-0.04)  |
| <b>Tropical Latin America</b>         |                           |                              |                          |                         |                    |
| Brazil                                | 685835 (606232-767559)    | 1633957 (1448187-1850611)    | 707.61 (622.15-805.29)   | 700.1 (620.96-789.68)   | 0.04 (0.01-0.07)   |
| Paraguay                              | 18951 (16256-21560)       | 41055 (35144-48142)          | 702.67 (592.52-827.65)   | 698.21 (592.13-829.96)  | 0.04 (0.02-0.07)   |
| <b>North Africa and Middle East</b>   |                           |                              |                          |                         |                    |
| Afghanistan                           | 43545 (36512-51688)       | 94872 (82454-108120)         | 623.74 (516.69-761.11)   | 628.56 (527.04-759.26)  | 0.03 (0.02-0.05)   |
| Algeria                               | 115156 (98196-133677)     | 282530 (240467-332317)       | 768.09 (642.28-912.32)   | 797.23 (678.17-959.48)  | 0.14 (0.13-0.15)   |
| Bahrain                               | 1932 (1678-2209)          | 7969 (6691-9424)             | 751.16 (633.17-903.24)   | 814.75 (692.47-970.29)  | 0.29 (0.28-0.3)    |
| Egypt                                 | 220848 (191953-253024)    | 492104 (423228-569916)       | 697.87 (581.02-828)      | 744.85 (631.37-898.99)  | 0.2 (0.19-0.21)    |
| Iran (Islamic Republic of)            | 254231 (229906-282073)    | 600289 (533023-675048)       | 774.54 (683.84-877.14)   | 809.51 (717.15-921.19)  | 0.13 (0.12-0.14)   |
| Iraq                                  | 80024 (69020-91700)       | 198110 (170051-229127)       | 723.18 (599.87-868.82)   | 752.72 (640.94-906.68)  | 0.15 (0.14-0.16)   |
| Jordan                                | 15221 (13307-17374)       | 65574 (56005-75716)          | 777.02 (653.37-937.85)   | 816.99 (695.06-962.64)  | 0.18 (0.17-0.2)    |
| Kuwait                                | 7378 (6409-8416)          | 27741 (23425-32271)          | 862.52 (721.11-1036.07)  | 896.16 (753.32-1079.93) | 0.13 (0.11-0.16)   |
| Lebanon                               | 17183 (14706-20264)       | 48762 (40823-58604)          | 769.58 (647.08-928.21)   | 812.75 (685.34-966.24)  | 0.19 (0.18-0.21)   |
| Libya                                 | 19325 (16817-22154)       | 39796 (34166-46585)          | 777.67 (655.26-924.49)   | 782.54 (657.92-931.93)  | 0.05 (0.03-0.07)   |
| Morocco                               | 116759 (100121-135569)    | 237333 (198818-283263)       | 705.18 (585.55-842.85)   | 731.94 (615.95-884.83)  | 0.12 (0.12-0.12)   |
| Oman                                  | 7432 (6578-8376)          | 20008 (17167-23303)          | 692.49 (594.04-807.42)   | 762.38 (641.21-921.08)  | 0.31 (0.29-0.33)   |
| Palestine                             | 9130 (7925-10504)         | 23904 (20804-27495)          | 729.86 (611.57-865.47)   | 760.54 (641.97-905.18)  | 0.12 (0.11-0.13)   |
| Qatar                                 | 1664 (1437-1918)          | 12773 (10821-15135)          | 801.89 (673.05-959.72)   | 864.94 (734.12-1017.07) | 0.29 (0.27-0.31)   |
| Saudi Arabia                          | 62838 (54831-71282)       | 166148 (143791-193176)       | 742.1 (621.9-893.67)     | 802.96 (678.58-961.03)  | 0.27 (0.26-0.28)   |
| Sudan                                 | 76840 (64619-88886)       | 171230 (147765-196204)       | 674.78 (545.79-814.43)   | 706.62 (596.92-851.83)  | 0.16 (0.15-0.16)   |
| Syrian Arab Republic                  | 54080 (46645-61927)       | 93998 (78984-113264)         | 750.52 (620.4-893.95)    | 791.02 (664.75-960.92)  | 0.18 (0.15-0.22)   |
| Tunisia                               | 43016 (36618-50468)       | 97595 (82241-117308)         | 775.23 (647.57-941.65)   | 801.81 (674.93-959.44)  | 0.1 (0.1-0.11)     |
| Türkiye                               | 301041 (258654-350058)    | 717157 (600899-859863)       | 788.67 (665.15-942.32)   | 831.38 (702.62-996.93)  | 0.21 (0.18-0.23)   |
| United Arab Emirates                  | 6774 (5906-7728)          | 45606 (37436-54719)          | 795.56 (676.99-937.9)    | 861.26 (719.42-1024.69) | 0.26 (0.24-0.29)   |
| Yemen                                 | 46403 (40057-53629)       | 125563 (108472-143824)       | 657.75 (550.11-789.27)   | 683.02 (579.74-818.08)  | 0.14 (0.13-0.16)   |
| <b>South Asia</b>                     |                           |                              |                          |                         |                    |
| Bangladesh                            | 336392 (291091-390595)    | 809358 (685010-963194)       | 540.54 (453.9-648.21)    | 602.95 (510.28-719.33)  | 0.38 (0.37-0.4)    |
| Bhutan                                | 1736 (1494-1988)          | 3674 (3127-4299)             | 535.92 (452.04-639.88)   | 604.69 (515.63-713.75)  | 0.43 (0.41-0.44)   |
| India                                 | 2715763 (2448379-3016349) | 6722228 (5937217-7631762)    | 532.4 (471.71-605.64)    | 595.16 (526.69-677.85)  | 0.42 (0.41-0.44)   |
| Nepal                                 | 57371 (49168-66047)       | 134577 (112915-158904)       | 519.93 (429.23-618.35)   | 583.58 (487.67-696.96)  | 0.4 (0.39-0.4)     |
| Pakistan                              | 374279 (332523-416454)    | 803962 (719443-893678)       | 543.29 (479.67-620.59)   | 577.37 (507.37-661.31)  | 0.21 (0.2-0.23)    |
| <b>East Asia</b>                      |                           |                              |                          |                         |                    |
| China                                 | 4683303 (4036499-5435212) | 13099727 (11320895-15376467) | 644.58 (558.65-751.14)   | 692.5 (607.26-802)      | 0.23 (0.2-0.27)    |
| Democratic People's Republic of Korea | 75073 (62108-91698)       | 171489 (140046-214280)       | 542.33 (440.94-677.83)   | 595.34 (492.56-731.51)  | 0.31 (0.29-0.32)   |
| Taiwan (Province of China)            | 89537 (73424-109883)      | 263229 (213899-327993)       | 625.66 (511.59-783.68)   | 672.69 (558.99-823.74)  | 0.24 (0.14-0.34)   |
| <b>Oceania</b>                        |                           |                              |                          |                         |                    |
| American Samoa                        | 143 (123-165)             | 243 (202-291)                | 561.39 (464.19-683.8)    | 582.34 (487-703.97)     | 0.1 (0.09-0.11)    |
| Cook Islands                          | 74 (62-88)                | 149 (123-185)                | 589.31 (479.78-724.57)   | 629.67 (528.69-767.12)  | 0.21 (0.21-0.21)   |
| Fiji                                  | 2028 (1722-2370)          | 3654 (3042-4378)             | 528.63 (435.8-645.22)    | 547.66 (459.28-667.43)  | 0.08 (0.07-0.09)   |
| Guam                                  | 451 (384-530)             | 1242 (1021-1525)             | 600.71 (496.67-735.5)    | 616.53 (517.91-750.57)  | 0.09 (0.07-0.1)    |
| Kiribati                              | 183 (155-213)             | 327 (277-384)                | 472.75 (386.94-582.31)   | 491.29 (408.82-597.63)  | 0.11 (0.1-0.11)    |
| Marshall Islands                      | 110 (94-128)              | 163 (139-193)                | 503.62 (420.37-623.99)   | 531.65 (441.9-657.76)   | 0.18 (0.17-0.19)   |
| Micronesia (Federated States of)      | 292 (246-343)             | 337 (285-399)                | 503.2 (416.94-619.1)     | 530.85 (441.82-642.77)  | 0.16 (0.15-0.17)   |

TableS1(continued)

|                                    |                        |                          |                        |                        |                    |
|------------------------------------|------------------------|--------------------------|------------------------|------------------------|--------------------|
| Nauru                              | 25 (21–29)             | 30 (26–36)               | 511.06 (417.7–634.11)  | 520.27 (433.88–634.68) | 0.05 (0.01–0.09)   |
| Niue                               | 13 (11–16)             | 11 (9–14)                | 542.27 (447.95–664.44) | 573.55 (479.31–704.95) | 0.16 (0.15–0.16)   |
| Northern Mariana Islands           | 115 (99–131)           | 252 (212–304)            | 606.85 (498.52–738.44) | 623.15 (521.72–749.39) | 0.04 (0.02–0.06)   |
| Palau                              | 52 (44–63)             | 97 (80–120)              | 543.1 (443.81–671.52)  | 574.81 (480.41–706.22) | 0.15 (0.14–0.17)   |
| Papua New Guinea                   | 9679 (8266–11305)      | 26968 (23004–31318)      | 516.17 (427.52–631.93) | 533.99 (449.15–646.06) | 0.08 (0.07–0.09)   |
| Samoa                              | 534 (456–626)          | 847 (725–1011)           | 554.06 (456.73–678.06) | 578.18 (484.9–709.87)  | 0.11 (0.1–0.12)    |
| Solomon Islands                    | 807 (691–932)          | 1876 (1608–2171)         | 507.49 (417.56–630.58) | 522.92 (436.89–635.65) | 0.06 (0.05–0.08)   |
| Tokelau                            | 7 (6–9)                | 8 (7–10)                 | 545.44 (453.47–677.11) | 578.04 (481.18–706.97) | 0.17 (0.16–0.18)   |
| Tonga                              | 347 (296–408)          | 497 (419–591)            | 569.96 (469.71–693.32) | 587.01 (489.95–711.26) | 0.07 (0.07–0.08)   |
| Tuvalu                             | 31 (26–37)             | 51 (43–62)               | 499.61 (407.52–610.66) | 534.8 (449.39–652.75)  | 0.2 (0.19–0.21)    |
| Vanuatu                            | 379 (321–442)          | 919 (785–1079)           | 516.36 (425.14–631.16) | 527.04 (438.44–637.51) | 0.05 (0.05–0.06)   |
| <b>Southeast Asia</b>              |                        |                          |                        |                        |                    |
| Cambodia                           | 24706 (20940–28769)    | 58857 (49295–70911)      | 480.76 (391.12–599.51) | 520.24 (430.79–644.82) | 0.27 (0.25–0.29)   |
| Indonesia                          | 506390 (450318–568265) | 1099460 (963117–1264038) | 512.47 (445.76–591.2)  | 543.69 (475.8–623.55)  | 0.17 (0.16–0.19)   |
| Lao People's Democratic Republic   | 10363 (8714–12175)     | 22534 (19057–26892)      | 473.84 (389.84–585.4)  | 513.59 (425.69–630.29) | 0.27 (0.25–0.29)   |
| Malaysia                           | 60614 (52350–69864)    | 157561 (132837–187768)   | 562.22 (467.68–680.71) | 607.56 (512.28–729.19) | 0.26 (0.25–0.27)   |
| Maldives                           | 594 (512–686)          | 1975 (1698–2308)         | 556.77 (463.16–683.24) | 610.49 (513.09–738.67) | 0.31 (0.3–0.33)    |
| Mauritius                          | 4084 (3473–4888)       | 9549 (7781–11679)        | 568.03 (470.28–685.29) | 604.18 (502.21–729.63) | 0.17 (0.16–0.18)   |
| Myanmar                            | 109861 (91666–131882)  | 229237 (191128–279783)   | 488.89 (403–600.89)    | 523.75 (431.84–642.52) | 0.25 (0.23–0.26)   |
| Philippines                        | 180441 (161393–202033) | 429779 (382305–488255)   | 541.36 (472.74–624.76) | 554.2 (488.33–636.83)  | 0.06 (0.05–0.07)   |
| Seychelles                         | 340 (286–408)          | 598 (501–722)            | 556.34 (463.23–673.02) | 594.98 (498.36–716.76) | 0.21 (0.2–0.22)    |
| Sri Lanka                          | 61489 (52410–72628)    | 148885 (124476–184153)   | 569.7 (471.53–690.28)  | 613.63 (515.76–742.3)  | 0.24 (0.23–0.26)   |
| Thailand                           | 198340 (167076–235407) | 608167 (495442–751305)   | 577.62 (471.84–702.42) | 625.22 (524.14–761.67) | 0.25 (0.25–0.26)   |
| Timor-Leste                        | 1670 (1439–1915)       | 4782 (4054–5714)         | 505.35 (417.54–620.91) | 533.05 (445.12–657.9)  | 0.18 (0.17–0.19)   |
| Viet Nam                           | 235316 (199947–280329) | 513272 (430942–627684)   | 533.71 (440.32–655.49) | 586.76 (487.87–718.85) | 0.3 (0.29–0.31)    |
| <b>Central Sub-Saharan Africa</b>  |                        |                          |                        |                        |                    |
| Angola                             | 30756 (26160–35826)    | 104717 (89723–120843)    | 649.24 (537.21–790.68) | 689.2 (573.42–828.3)   | 0.2 (0.19–0.22)    |
| Central African Republic           | 7686 (6530–8927)       | 15685 (13338–18105)      | 597.23 (502.36–734.55) | 622.89 (523.4–761.35)  | 0.13 (0.13–0.14)   |
| Congo                              | 8119 (6928–9435)       | 20413 (17392–23728)      | 646.09 (537.71–786.42) | 701.99 (593.22–845.67) | 0.28 (0.26–0.3)    |
| Democratic Republic of the Congo   | 121672 (103945–141943) | 303504 (261015–353103)   | 657.72 (539.21–793.78) | 687.15 (573.81–838.12) | 0.14 (0.11–0.16)   |
| Equatorial Guinea                  | 1433 (1227–1676)       | 4936 (4245–5675)         | 645.89 (533.58–776.35) | 722.77 (609.26–879.24) | 0.42 (0.4–0.45)    |
| Gabon                              | 4359 (3681–5165)       | 8075 (6916–9521)         | 679.64 (568.22–819.17) | 730.51 (614.62–885.41) | 0.24 (0.23–0.25)   |
| <b>Eastern Sub-Saharan Africa</b>  |                        |                          |                        |                        |                    |
| Burundi                            | 20189 (17104–23952)    | 45788 (39460–52975)      | 709.55 (579.51–865.7)  | 749.88 (628.32–908.12) | 0.18 (0.17–0.19)   |
| Comoros                            | 1837 (1561–2158)       | 4012 (3418–4708)         | 769.09 (630.44–930.51) | 799.17 (671.77–959.74) | 0.11 (0.1–0.13)    |
| Djibouti                           | 1365 (1171–1565)       | 5440 (4677–6350)         | 764.24 (627.21–928.74) | 802.11 (671.39–965.04) | 0.15 (0.13–0.17)   |
| Eritrea                            | 10031 (8650–11519)     | 23542 (20220–27217)      | 696.54 (580.4–856.38)  | 730.68 (614.13–887.12) | 0.13 (0.11–0.14)   |
| Ethiopia                           | 172786 (153559–193722) | 434236 (385261–484800)   | 717.64 (623.87–826.73) | 791.88 (691.7–919.32)  | 0.31 (0.3–0.32)    |
| Kenya                              | 90526 (80972–100756)   | 215835 (193000–240565)   | 787.08 (689.69–901.48) | 801.74 (706.67–918.3)  | -0.39 (-0.55–0.23) |
| Madagascar                         | 45670 (38834–53096)    | 103465 (89248–119948)    | 752 (624.46–912.4)     | 774.23 (641.38–951.55) | 0.07 (0.06–0.08)   |
| Malawi                             | 33130 (28271–38352)    | 68387 (58916–79690)      | 710.8 (585.23–857.74)  | 743.39 (622.97–895.11) | 0.11 (0.09–0.13)   |
| Mozambique                         | 48118 (40994–56213)    | 104040 (89305–121427)    | 703.01 (579.07–852.01) | 727.19 (597.43–883.63) | 0.06 (0.05–0.08)   |
| Rwanda                             | 24627 (20815–28906)    | 53608 (45321–63361)      | 711.48 (583.6–865.63)  | 757.36 (628.84–928.62) | 0.2 (0.19–0.22)    |
| Somalia                            | 22108 (19088–25336)    | 60944 (52370–70089)      | 691.75 (576.84–845.46) | 699.75 (579.82–851.57) | 0.01 (0–0.02)      |
| South Sudan                        | 22779 (19502–26761)    | 35385 (30491–40896)      | 744.26 (617.53–908.99) | 770.88 (646.07–928.48) | 0.1 (0.09–0.1)     |
| Uganda                             | 60984 (52300–70864)    | 151152 (129502–175167)   | 728.9 (604.67–881.31)  | 758.14 (624.83–922.41) | 0.11 (0.1–0.13)    |
| United Republic of Tanzania        | 99251 (84228–116496)   | 241417 (206890–279163)   | 751.41 (619.33–912.66) | 783.06 (655.3–940.15)  | 0.33 (0.25–0.41)   |
| Zambia                             | 26083 (22290–30278)    | 67047 (57951–77171)      | 718.5 (594.29–886.05)  | 754.87 (632.48–909.43) | 0.13 (0.11–0.16)   |
| <b>Southern Sub-Saharan Africa</b> |                        |                          |                        |                        |                    |
| Botswana                           | 4713 (4036–5551)       | 10576 (9088–12402)       | 680.94 (570.85–830.88) | 711.58 (594.71–853.38) | 0.13 (0.1–0.16)    |
| Eswatini                           | 2598 (2224–3008)       | 4251 (3620–4994)         | 656.84 (543.32–800.74) | 681.67 (568.95–835.8)  | 0.11 (0.08–0.14)   |
| Lesotho                            | 6198 (5248–7342)       | 7397 (6272–8748)         | 639.34 (533.56–776.52) | 657.19 (552.81–796.39) | 0.07 (0.04–0.1)    |
| Namibia                            | 5384 (4625–6293)       | 10792 (9226–12626)       | 697.43 (578.37–841.76) | 729.24 (612.08–877.39) | 0.14 (0.12–0.16)   |
| South Africa                       | 169981 (151116–191718) | 332364 (294880–375401)   | 726.24 (634.24–830.93) | 749.82 (665.03–852.66) | 0.13 (0.1–0.16)    |
| Zimbabwe                           | 36465 (31010–42476)    | 55998 (47752–64402)      | 681.11 (561.12–828.09) | 684.67 (571.73–826.78) | -0.04 (-0.07–0.01) |
| <b>Western Sub-Saharan Africa</b>  |                        |                          |                        |                        |                    |
| Benin                              | 17862 (15227–20952)    | 48182 (41398–55238)      | 673.86 (561.25–820.03) | 705.53 (589.26–850.61) | 0.14 (0.13–0.14)   |
| Burkina Faso                       | 33547 (28475–39595)    | 80048 (69323–93161)      | 656.11 (546.02–799.74) | 683.91 (569.14–834.84) | 0.14 (0.13–0.15)   |
| Cabo Verde                         | 2147 (1834–2534)       | 3603 (3059–4237)         | 764.11 (643.22–921.11) | 811.49 (682.4–970.55)  | 0.21 (0.19–0.22)   |
| Cameroon                           | 36130 (30875–42231)    | 110737 (95664–129381)    | 666.67 (554.33–815.57) | 704.1 (590.86–860.6)   | 0.16 (0.14–0.18)   |
| Chad                               | 22380 (19013–26484)    | 55583 (48125–64020)      | 648.58 (539.18–795.97) | 681.67 (568.39–832.45) | 0.16 (0.15–0.18)   |
| Côte d'Ivoire                      | 36346 (31496–41876)    | 97588 (83781–113070)     | 669.61 (549.91–817.58) | 708.63 (599.3–863.92)  | 0.19 (0.17–0.21)   |
| Gambia                             | 3340 (2865–3850)       | 9106 (7843–10476)        | 686.44 (569.31–827.44) | 717.83 (598.87–865.58) | 0.14 (0.13–0.15)   |
| Ghana                              | 53258 (45449–61406)    | 137281 (117985–161017)   | 683.99 (562.23–824.68) | 718.01 (596.18–873.81) | 0.13 (0.12–0.14)   |
| Guinea                             | 24591 (20916–29373)    | 48454 (41935–55863)      | 657.7 (543.13–811.52)  | 687.58 (576.02–829.46) | 0.13 (0.12–0.14)   |
| Guinea-Bissau                      | 3084 (2650–3616)       | 6165 (5345–7052)         | 626.16 (515.48–761.5)  | 657.6 (555.46–792.3)   | 0.16 (0.15–0.17)   |
| Liberia                            | 9377 (8013–10980)      | 18937 (16364–21799)      | 675.13 (560.18–824.89) | 717.41 (601.33–864.68) | 0.21 (0.2–0.21)    |
| Mali                               | 29967 (25593–35235)    | 80152 (68905–93183)      | 660.36 (548.16–798.97) | 700.37 (585.75–848.61) | 0.18 (0.17–0.19)   |
| Mauritania                         | 8574 (7348–10037)      | 19635 (16942–22906)      | 700.17 (584.57–843.18) | 757.41 (635.8–918.67)  | 0.26 (0.25–0.27)   |
| Niger                              | 23822 (20542–27475)    | 77428 (67323–89776)      | 655.73 (546.11–802.03) | 684.97 (571.97–831.32) | 0.15 (0.14–0.17)   |
| Nigeria                            | 361171 (321773–403574) | 851401 (758670–947878)   | 696.19 (609.13–794.96) | 733.28 (645.9–841.95)  | 0.16 (0.15–0.17)   |
| Sao Tome and Principe              | 554 (476–648)          | 958 (819–1111)           | 707.17 (595.53–849.07) | 759.89 (630.05–910.26) | 0.23 (0.22–0.23)   |
| Senegal                            | 28724 (24546–33435)    | 66088 (57357–76570)      | 691.45 (573.22–835.49) | 724.6 (612.13–868.16)  | 0.13 (0.12–0.14)   |
| Sierra Leone                       | 16061 (13591–18894)    | 31960 (27543–36904)      | 663.05 (548.33–808.26) | 696.16 (580.85–837.14) | 0.14 (0.13–0.16)   |
| Togo                               | 11513 (9899–13285)     | 30616 (26514–35269)      | 670.05 (555.78–813.89) | 700.37 (588.56–847.75) | 0.13 (0.11–0.14)   |

<sup>†</sup> Color intensity represents value magnitude. Red indicates positive values, darker for larger. Blue indicates negative values, darker for more negative.

**Abbreviations:** ASPR, age-standardized Prevalence per 100,000 population; UI, uncertainty interval; EAPC, estimated annual percentage change; CI, confidence interval; SDI, Socio-demographic Index.

# Table S2

Table S2 The YLDs burden of heart failure and its temporal trends by 204 countries and territories, for all ages and both sexes, 1990–2021

|                                  | YLDs (95% UI)          |                        | ASyr (95% UI)         |                       | 1990–2021 EAPC (95% CI) <sup>1</sup> |
|----------------------------------|------------------------|------------------------|-----------------------|-----------------------|--------------------------------------|
|                                  | 1990                   | 2021                   | 1990                  | 2021                  |                                      |
| <b>Central Asia</b>              |                        |                        |                       |                       |                                      |
| Armenia                          | 1750 (1152–2434)       | 2819 (1820–3919)       | 67.11 (43.15–93.96)   | 71.62 (47.43–98.98)   | 0.32 (0.26–0.38)                     |
| Azerbaijan                       | 3092 (2048–4417)       | 5426 (3538–7677)       | 60.79 (39.52–86.93)   | 63.81 (41.77–91.03)   | 0.23 (0.18–0.27)                     |
| Georgia                          | 3798 (2430–5390)       | 3719 (2389–5320)       | 66.91 (42.99–94.72)   | 66.79 (42.98–95.17)   | 0.02 (-0.02–0.07)                    |
| Kazakhstan                       | 7670 (5058–10847)      | 10489 (6811–14791)     | 62.08 (40.84–88.71)   | 65.35 (42.18–92.74)   | 0.28 (0.22–0.34)                     |
| Kyrgyzstan                       | 2080 (1377–2936)       | 3077 (2020–4342)       | 64.85 (42.93–91.72)   | 65.31 (42.44–93.25)   | 0.07 (0.03–0.11)                     |
| Mongolia                         | 753 (506–1064)         | 1308 (861–1870)        | 58.82 (38.27–83.99)   | 61.22 (39.76–87.86)   | 0.22 (0.18–0.27)                     |
| Tajikistan                       | 2034 (1352–2860)       | 3726 (2484–5209)       | 61.12 (39.34–86.08)   | 62.61 (40.89–89.04)   | 0.12 (0.08–0.17)                     |
| Turkmenistan                     | 1347 (913–1886)        | 2380 (1553–3358)       | 61.18 (40.06–86.41)   | 63.69 (41.37–90.22)   | 0.2 (0.16–0.24)                      |
| Uzbekistan                       | 8403 (5526–11654)      | 14975 (9913–21423)     | 60.41 (39.4–87.1)     | 61.99 (40.12–88.87)   | 0.12 (0.08–0.16)                     |
| <b>Central Europe</b>            |                        |                        |                       |                       |                                      |
| Albania                          | 1424 (943–1984)        | 2490 (1576–3587)       | 63.8 (41.52–89.65)    | 64.32 (41.56–91.51)   | 0.06 (0.04–0.08)                     |
| Bosnia and Herzegovina           | 2285 (1505–3207)       | 3374 (2160–4773)       | 63.3 (41.45–89.2)     | 63.69 (41.91–87.62)   | 0.07 (0.05–0.1)                      |
| Bulgaria                         | 6199 (3972–9018)       | 7399 (4591–10840)      | 60.13 (39.3–85.95)    | 58.76 (37.97–83.42)   | -0.07 (-0.09–0.05)                   |
| Croatia                          | 2824 (1823–4015)       | 3743 (2433–5325)       | 54.95 (36.11–77.5)    | 49.12 (32.28–69.46)   | -0.62 (-0.82–0.43)                   |
| Czechia                          | 9488 (5915–13754)      | 14533 (9258–20725)     | 76.07 (48.55–109.44)  | 76.3 (50.55–108.33)   | 0.51 (0.25–0.76)                     |
| Hungary                          | 7901 (5094–11386)      | 10714 (6752–15463)     | 61.23 (40.39–87.47)   | 61.96 (40.28–87.89)   | 0.02 (0–0.03)                        |
| Montenegro                       | 387 (252–553)          | 545 (343–781)          | 66.25 (43.1–94.85)    | 65.62 (42.45–92.5)    | 0 (-0.02–0.01)                       |
| North Macedonia                  | 1058 (689–1476)        | 1678 (1073–2392)       | 61.37 (39.68–86.79)   | 62.25 (40.21–87.21)   | 0.07 (0.06–0.09)                     |
| Poland                           | 35897 (24215–49523)    | 63408 (43324–87949)    | 89.35 (60.11–123.73)  | 96.71 (66.12–134.5)   | 0.29 (0.18–0.39)                     |
| Romania                          | 14886 (9426–21109)     | 20719 (13269–29970)    | 60.82 (39.45–84.66)   | 61.65 (40.82–87.41)   | 0.32 (0.21–0.44)                     |
| Serbia                           | 4924 (3160–7004)       | 7706 (4959–10992)      | 52.31 (33.58–74.37)   | 53.44 (35.34–74.63)   | -0.43 (-0.64–0.22)                   |
| Slovakia                         | 3519 (2242–5113)       | 5229 (3319–7622)       | 63.09 (40.55–90.63)   | 63.72 (41.29–90.58)   | 0.53 (0.37–0.7)                      |
| Slovenia                         | 1463 (932–2082)        | 2685 (1761–3848)       | 65.72 (42.69–93.13)   | 67.95 (45.49–95.61)   | 0.18 (0.15–0.21)                     |
| <b>Eastern Europe</b>            |                        |                        |                       |                       |                                      |
| Belarus                          | 7498 (4802–10582)      | 9236 (5883–13359)      | 64.2 (41.3–90.68)     | 66.22 (42.94–94.18)   | 0.17 (0.13–0.22)                     |
| Estonia                          | 1254 (809–1783)        | 1704 (1082–2466)       | 67.32 (44.22–94.98)   | 68.74 (44.95–97.51)   | 0.12 (0.09–0.15)                     |
| Latvia                           | 2156 (1352–3060)       | 2438 (1558–3475)       | 66.16 (42.68–93.34)   | 66.58 (42.95–93.75)   | 0.06 (0.02–0.11)                     |
| Lithuania                        | 2759 (1743–3929)       | 3534 (2262–5038)       | 65.87 (41.77–92.69)   | 67.07 (44.27–94.19)   | 0.09 (0.06–0.13)                     |
| Republic of Moldova              | 2483 (1595–3562)       | 3317 (2148–4754)       | 62.43 (40.36–88.97)   | 64.1 (41.81–90.72)    | 0.13 (0.1–0.17)                      |
| Russian Federation               | 101673 (68937–140926)  | 137331 (92158–191646)  | 64.33 (43.63–89.8)    | 65.3 (44.39–90.42)    | 0.09 (0.05–0.14)                     |
| Ukraine                          | 40653 (27062–56798)    | 42572 (28472–60134)    | 64.93 (43.75–89.95)   | 63.14 (42.75–88.14)   | -0.03 (-0.06–0)                      |
| <b>Australasia</b>               |                        |                        |                       |                       |                                      |
| Australia                        | 13565 (8834–19136)     | 30868 (20747–43692)    | 73.06 (48.12–102.75)  | 73.26 (49.82–101.97)  | -0.21 (-0.34–0.07)                   |
| New Zealand                      | 2309 (1542–3239)       | 4614 (3095–6384)       | 61.64 (41.61–86.13)   | 60.66 (41.22–83.46)   | -0.19 (-0.28–0.1)                    |
| <b>High-income Asia Pacific</b>  |                        |                        |                       |                       |                                      |
| Brunei Darussalam                | 65 (44–90)             | 136 (90–186)           | 41.41 (27.78–57.33)   | 42.06 (28.52–58.05)   | 0.04 (0.03–0.04)                     |
| Japan                            | 64572 (43657–89456)    | 135402 (92601–188307)  | 45.56 (31.22–62.76)   | 44.2 (30.13–60.91)    | -0.14 (-0.17–0.11)                   |
| Republic of Korea                | 15361 (10422–21058)    | 42961 (29227–58567)    | 51.79 (35.26–72.02)   | 56.59 (38.21–77.32)   | 0.33 (0.21–0.46)                     |
| Singapore                        | 1038 (689–1422)        | 3539 (2378–4927)       | 47.48 (31.54–66.55)   | 49.66 (33.36–68.87)   | 0.14 (0.13–0.15)                     |
| <b>High-income North America</b> |                        |                        |                       |                       |                                      |
| Canada                           | 25577 (16973–36333)    | 55866 (35937–78749)    | 83.14 (55.69–116.96)  | 86.81 (57.2–120.29)   | 0.16 (0.05–0.27)                     |
| Greenland                        | 23 (15–32)             | 39 (25–55)             | 69.51 (45.43–97.96)   | 71.09 (46.46–99.28)   | 0.11 (0.1–0.12)                      |
| United States of America         | 241867 (163090–334578) | 429830 (296095–594497) | 79.69 (53.99–109.91)  | 81.83 (55.92–113.19)  | 0 (-0.03–0.04)                       |
| <b>Southern Latin America</b>    |                        |                        |                       |                       |                                      |
| Argentina                        | 18377 (12217–25711)    | 28362 (18724–39621)    | 58.34 (38.72–81.52)   | 53.53 (35.64–74.27)   | -0.27 (-0.29–0.25)                   |
| Chile                            | 6241 (4185–8624)       | 13401 (8869–18767)     | 59.03 (39.53–81.86)   | 57.66 (38.1–80)       | -0.02 (-0.04–0)                      |
| Uruguay                          | 1925 (1264–2738)       | 2709 (1785–3812)       | 52.88 (34.7–74.08)    | 52.29 (34.69–73.29)   | -0.03 (-0.04–0.02)                   |
| <b>Western Europe</b>            |                        |                        |                       |                       |                                      |
| Andorra                          | 26 (17–37)             | 71 (45–102)            | 52.33 (33.76–73.52)   | 52.79 (34.51–74.52)   | 0 (-0.02–0.01)                       |
| Austria                          | 9909 (6678–13891)      | 11274 (7643–15706)     | 87.31 (59.77–121.81)  | 64.64 (44.42–89.14)   | -1.33 (-1.47–1.18)                   |
| Belgium                          | 6369 (4108–9344)       | 8702 (5867–12120)      | 46.09 (30.08–65.93)   | 41.3 (28.24–57.15)    | 0.02 (-0.09–0.13)                    |
| Cyprus                           | 305 (194–431)          | 794 (498–1137)         | 41.48 (27.1–58.96)    | 43.91 (28.59–61.18)   | -0.27 (-0.45–0.1)                    |
| Denmark                          | 3165 (2035–4555)       | 5098 (3257–7367)       | 43.23 (28.98–61.3)    | 47.45 (30.81–66.25)   | 0.45 (0.22–0.68)                     |
| Finland                          | 3913 (2591–5529)       | 7319 (4742–10496)      | 60.76 (40.7–84.36)    | 62.18 (41.31–87.73)   | 0.12 (-0.09–0.33)                    |
| France                           | 79329 (52134–111723)   | 142990 (94952–204933)  | 100.11 (67.19–141.38) | 103.29 (67.32–143.42) | 0.04 (-0.09–0.16)                    |
| Germany                          | 68522 (44459–99326)    | 113978 (72794–161491)  | 60.36 (39.98–85.38)   | 63.39 (40.85–88.58)   | 0.97 (0.68–1.25)                     |
| Greece                           | 5824 (3730–8183)       | 7132 (4732–10055)      | 43.77 (28.86–61.06)   | 34.03 (23.41–47.98)   | -1.28 (-1.46–1.1)                    |
| Iceland                          | 84 (55–118)            | 156 (101–223)          | 29.91 (19.66–41.51)   | 30.07 (20.07–42.24)   | -0.18 (-0.36–0.01)                   |
| Ireland                          | 1898 (1214–2721)       | 3666 (2335–5197)       | 48.61 (31.56–68.52)   | 50.99 (33.07–71.31)   | 0.18 (0.16–0.19)                     |
| Israel                           | 2072 (1357–2963)       | 5662 (3643–7980)       | 42.72 (28.43–60.89)   | 45.98 (30.21–63.89)   | 0.21 (0.13–0.29)                     |
| Italy                            | 51778 (34883–72091)    | 94755 (65487–131070)   | 66.25 (44.99–92.12)   | 67.84 (46.6–93.66)    | 0.25 (-0.01–0.5)                     |
| Luxembourg                       | 275 (176–391)          | 564 (362–794)          | 56.92 (37.47–80.16)   | 58.69 (38.47–81.78)   | -0.12 (-0.47–0.24)                   |
| Malta                            | 187 (121–269)          | 439 (280–636)          | 48.52 (32.3–68.67)    | 49.79 (32.02–69.11)   | 0.56 (0.38–0.74)                     |
| Monaco                           | 32 (21–47)             | 46 (29–65)             | 51.04 (33.8–72.58)    | 51.63 (33.23–72.17)   | 0.02 (0.02–0.03)                     |
| Netherlands                      | 8835 (5863–12618)      | 16451 (10362–23701)    | 47.53 (31.95–66.92)   | 52.2 (33.68–73.77)    | 0.21 (0.11–0.32)                     |
| Norway                           | 3389 (2296–4704)       | 4968 (3327–7036)       | 53.11 (35.95–73.84)   | 54.4 (36.79–75.28)    | 0.11 (0.09–0.12)                     |
| Portugal                         | 6139 (3866–8838)       | 11679 (7377–16355)     | 49.88 (32.21–70.84)   | 50.87 (33.28–71.08)   | -0.08 (-0.14–0.02)                   |
| San Marino                       | 17 (11–25)             | 38 (25–56)             | 53.17 (34.63–75.44)   | 53.58 (34.54–76.11)   | 0 (-0.02–0.01)                       |
| Spain                            | 25507 (16097–36430)    | 52502 (35385–72461)    | 51.58 (32.98–72.33)   | 57.26 (38.57–78.68)   | 0.02 (-0.09–0.13)                    |
| Sweden                           | 12998 (8801–18202)     | 20625 (13617–29278)    | 97.27 (66.13–134.57)  | 99.87 (66.88–137.67)  | -0.03 (-0.11–0.05)                   |
| Switzerland                      | 4184 (2692–5921)       | 7464 (4738–10523)      | 43.53 (28.24–61.13)   | 44.7 (28.94–61.74)    | 0.39 (0.11–0.68)                     |
| United Kingdom                   | 33844 (22402–47730)    | 46882 (31821–66296)    | 41.06 (27.74–57.53)   | 40.97 (27.87–57.04)   | -0.17 (-0.22–0.11)                   |

TableS2(continued)

|                                       |                        |                          |                      |                      |                    |
|---------------------------------------|------------------------|--------------------------|----------------------|----------------------|--------------------|
| <b>Andean Latin America</b>           |                        |                          |                      |                      |                    |
| Bolivia (Plurinational State of)      | 2940 (1923–4220)       | 6174 (4095–8624)         | 78.39 (50.94–111.34) | 67.5 (44.82–92.91)   | -0.32 (-0.38–0.25) |
| Ecuador                               | 4053 (2739–5674)       | 10728 (6970–15064)       | 63.81 (41.86–90.53)  | 65.55 (42.55–92.06)  | 0.13 (0.12–0.15)   |
| Peru                                  | 8934 (6051–12378)      | 23060 (15137–32041)      | 63.58 (42.15–88.41)  | 68.4 (44.64–95.68)   | 0.29 (0.28–0.31)   |
| <b>Caribbean</b>                      |                        |                          |                      |                      |                    |
| Antigua and Barbuda                   | 41 (27–58)             | 64 (41–90)               | 69.04 (45.99–97.96)  | 69.53 (45.4–97.57)   | -0.04 (-0.08–0)    |
| Bahamas                               | 107 (71–150)           | 232 (151–326)            | 62.35 (40.67–88.45)  | 65.74 (42.26–93.41)  | 0.17 (0.16–0.18)   |
| Barbados                              | 199 (129–287)          | 321 (208–459)            | 66.56 (43.89–94.43)  | 70.82 (46.94–101.37) | 0.18 (0.17–0.19)   |
| Belize                                | 79 (53–111)            | 204 (135–282)            | 64.34 (42.62–90.43)  | 67.75 (44.11–95.54)  | 0.16 (0.15–0.17)   |
| Bermuda                               | 40 (26–57)             | 91 (58–131)              | 69.58 (45.98–97.97)  | 76.16 (49.52–107.89) | 0.29 (0.27–0.31)   |
| Cuba                                  | 7007 (4513–9925)       | 12588 (8051–18050)       | 68.96 (44.41–96.96)  | 72.25 (47.2–102.58)  | 0.15 (0.13–0.16)   |
| Dominica                              | 39 (26–56)             | 47 (30–67)               | 60.52 (39.66–86.63)  | 63.7 (41.53–89.59)   | 0.15 (0.14–0.16)   |
| Dominican Republic                    | 2763 (1817–3864)       | 6585 (4299–9187)         | 63.64 (41.5–89.83)   | 66.35 (43.11–92.64)  | 0.1 (0.08–0.13)    |
| Grenada                               | 52 (34–72)             | 64 (41–91)               | 60.95 (39.82–85.8)   | 63.87 (42.55–90.34)  | 0.09 (0.07–0.11)   |
| Guyana                                | 261 (171–374)          | 356 (235–501)            | 56.93 (36.86–82.3)   | 59.77 (39.22–84.69)  | 0.13 (0.12–0.14)   |
| Haiti                                 | 1835 (1206–2553)       | 4060 (2686–5594)         | 52.33 (34.24–73.73)  | 55.7 (35.15–78.43)   | 0.19 (0.17–0.21)   |
| Jamaica                               | 1382 (918–1963)        | 2125 (1408–3004)         | 67.57 (44.37–95.64)  | 70.36 (46.34–99.06)  | 0.07 (0.03–0.11)   |
| Puerto Rico                           | 2532 (1615–3607)       | 5096 (3272–7146)         | 70.5 (45.15–99.12)   | 75.57 (49.51–106.63) | 0.23 (0.22–0.24)   |
| Saint Kitts and Nevis                 | 24 (16–35)             | 36 (23–51)               | 60.12 (39.06–85.35)  | 64.89 (41.64–91.12)  | 0.23 (0.2–0.26)    |
| Saint Lucia                           | 65 (43–91)             | 144 (94–202)             | 64 (41.36–89.2)      | 68.18 (45.21–95.62)  | 0.19 (0.17–0.21)   |
| Saint Vincent and the Grenadines      | 51 (33–72)             | 85 (54–119)              | 61.64 (39.31–87.03)  | 65.85 (42.41–92.85)  | 0.2 (0.19–0.21)    |
| Suriname                              | 170 (111–238)          | 376 (245–533)            | 62.47 (40.37–87.94)  | 64.9 (42.56–91.81)   | 0.11 (0.1–0.13)    |
| Trinidad and Tobago                   | 571 (377–805)          | 1150 (751–1641)          | 62.5 (40.33–88.64)   | 66.91 (43.74–94.43)  | 0.24 (0.23–0.25)   |
| United States Virgin Islands          | 52 (33–71)             | 109 (69–157)             | 63.39 (40.53–89.24)  | 67.75 (44.23–96.18)  | 0.18 (0.17–0.19)   |
| <b>Central Latin America</b>          |                        |                          |                      |                      |                    |
| Colombia                              | 12493 (8319–17168)     | 34848 (22649–49084)      | 61.47 (40.65–85.82)  | 65.61 (42.97–91.96)  | 0.22 (0.21–0.24)   |
| Costa Rica                            | 1420 (962–2001)        | 3624 (2347–5110)         | 67.09 (44.61–94.29)  | 70.01 (45.31–98.05)  | 0.17 (0.16–0.17)   |
| El Salvador                           | 2236 (1505–3132)       | 4299 (2862–6063)         | 62.33 (41.18–87.69)  | 66.09 (43.73–92.62)  | 0.25 (0.23–0.26)   |
| Guatemala                             | 2690 (1790–3745)       | 7241 (4800–9991)         | 59.21 (39.25–83.73)  | 61.78 (40.39–86.56)  | 0.18 (0.16–0.19)   |
| Honduras                              | 1619 (1081–2268)       | 4093 (2724–5686)         | 59.74 (39.39–83.96)  | 60.34 (38.81–84.71)  | 0.07 (0.06–0.09)   |
| Mexico                                | 34258 (23123–47222)    | 80781 (54609–112072)     | 65.8 (44.41–90.4)    | 67.27 (45.71–93.34)  | 0.08 (0.06–0.09)   |
| Nicaragua                             | 1400 (940–1955)        | 3411 (2280–4683)         | 64.67 (42.32–90.17)  | 67.09 (43.96–92.21)  | 0.16 (0.14–0.17)   |
| Panama                                | 1121 (749–1579)        | 3054 (2018–4231)         | 66.77 (43.64–93.74)  | 69.33 (45.88–96.15)  | 0.13 (0.11–0.14)   |
| Venezuela (Bolivarian Republic of)    | 7673 (5200–10621)      | 18590 (12163–25795)      | 65.88 (43.53–92.43)  | 67.03 (43.98–92.84)  | 0.13 (0.11–0.14)   |
| <b>Tropical Latin America</b>         |                        |                          |                      |                      |                    |
| Brazil                                | 61956 (41667–84916)    | 149769 (101823–206747)   | 63.53 (42.85–87.35)  | 64.27 (43.7–88.49)   | 0.08 (0.06–0.1)    |
| Paraguay                              | 1749 (1195–2463)       | 3834 (2503–5376)         | 64.33 (42.78–91.06)  | 65.11 (42.05–91.13)  | 0.07 (0.06–0.09)   |
| <b>North Africa and Middle East</b>   |                        |                          |                      |                      |                    |
| Afghanistan                           | 4085 (2693–5659)       | 8982 (6059–12609)        | 58.02 (38.22–82.01)  | 58.67 (38.33–81.89)  | 0.04 (0.03–0.06)   |
| Algeria                               | 10807 (7217–15285)     | 26494 (17287–36700)      | 71.41 (46.88–99.43)  | 74.46 (48.94–104.45) | 0.15 (0.14–0.16)   |
| Bahrain                               | 182 (121–254)          | 755 (515–1050)           | 70.06 (46.08–98.37)  | 76.67 (51.13–106.72) | 0.32 (0.31–0.33)   |
| Egypt                                 | 21225 (14318–29489)    | 46901 (31527–64712)      | 66.29 (43.93–93.46)  | 70.27 (46.58–97.06)  | 0.18 (0.17–0.19)   |
| Iran (Islamic Republic of)            | 23919 (16351–33261)    | 56127 (38639–76381)      | 72.21 (49.55–99.83)  | 75.52 (52.12–103.73) | 0.13 (0.12–0.14)   |
| Iraq                                  | 7583 (5050–10638)      | 18820 (12468–26162)      | 68.28 (44.53–96.4)   | 71.18 (47.42–99.06)  | 0.15 (0.14–0.16)   |
| Jordan                                | 1451 (990–2011)        | 6235 (4153–8628)         | 73.27 (48.53–102.95) | 77.04 (51.06–106.42) | 0.18 (0.17–0.2)    |
| Kuwait                                | 692 (461–963)          | 2594 (1717–3624)         | 79.9 (52.3–112.22)   | 83.49 (54.67–114.95) | 0.16 (0.12–0.2)    |
| Lebanon                               | 1636 (1079–2272)       | 4643 (3039–6488)         | 72.94 (47.78–102.72) | 77.52 (50.67–108.24) | 0.21 (0.19–0.23)   |
| Libya                                 | 1819 (1233–2546)       | 3736 (2491–5228)         | 72.71 (47.63–102.05) | 73.18 (48.42–102.61) | 0.06 (0.04–0.07)   |
| Morocco                               | 10936 (7286–15200)     | 22184 (14780–30928)      | 65.3 (42.9–91.26)    | 68.2 (44.87–94.87)   | 0.14 (0.14–0.14)   |
| Oman                                  | 695 (476–970)          | 1877 (1262–2593)         | 64.01 (43.09–88.67)  | 70.77 (47.45–99.42)  | 0.32 (0.3–0.34)    |
| Palestine                             | 866 (582–1216)         | 2274 (1511–3178)         | 68.73 (44.92–95.76)  | 71.91 (46.87–99.46)  | 0.14 (0.13–0.15)   |
| Qatar                                 | 157 (105–218)          | 1215 (817–1752)          | 75 (49.15–104.12)    | 81.69 (53.93–113.65) | 0.33 (0.31–0.36)   |
| Saudi Arabia                          | 5940 (4003–8304)       | 15778 (10324–21884)      | 69.35 (45.61–96.85)  | 75.63 (49.48–105.87) | 0.3 (0.29–0.31)    |
| Sudan                                 | 7209 (4733–10144)      | 16080 (10763–22378)      | 62.67 (40.76–89.17)  | 65.69 (43.61–91.43)  | 0.16 (0.15–0.16)   |
| Syrian Arab Republic                  | 5124 (3497–7119)       | 8830 (5770–12367)        | 70.01 (45.96–97.97)  | 73.88 (48.77–103.31) | 0.18 (0.15–0.21)   |
| Tunisia                               | 4048 (2639–5722)       | 9153 (5950–12692)        | 72.42 (46.84–101.56) | 75.17 (48.95–103.97) | 0.11 (0.11–0.12)   |
| Türkiye                               | 28524 (19025–39825)    | 67825 (44361–93133)      | 74.41 (49.54–103.65) | 78.52 (51.49–107.12) | 0.21 (0.19–0.23)   |
| United Arab Emirates                  | 634 (421–885)          | 4287 (2844–6069)         | 74.11 (48–103.23)    | 80.44 (53.54–112.46) | 0.27 (0.25–0.29)   |
| Yemen                                 | 4351 (2937–6115)       | 11752 (7896–16362)       | 61.16 (40.16–85.72)  | 63.55 (41.08–88.99)  | 0.14 (0.12–0.16)   |
| <b>South Asia</b>                     |                        |                          |                      |                      |                    |
| Bangladesh                            | 32618 (22500–45337)    | 78325 (51079–107523)     | 52.04 (34.45–72.68)  | 58.2 (38.28–79.97)   | 0.38 (0.36–0.39)   |
| Bhutan                                | 164 (113–231)          | 346 (227–484)            | 50.2 (32.93–70.78)   | 56.74 (37.13–78.96)  | 0.43 (0.42–0.44)   |
| India                                 | 253150 (172880–347081) | 624997 (425464–854741)   | 48.98 (33.5–66.79)   | 54.96 (37.44–75.83)  | 0.43 (0.41–0.45)   |
| Nepal                                 | 5390 (3591–7544)       | 12587 (8316–17420)       | 48.26 (31.56–67.86)  | 54.22 (35.98–74.81)  | 0.39 (0.38–0.4)    |
| Pakistan                              | 35086 (23542–48300)    | 75369 (51162–103772)     | 50.42 (34.16–69.94)  | 53.49 (36.24–74.1)   | 0.21 (0.19–0.22)   |
| <b>East Asia</b>                      |                        |                          |                      |                      |                    |
| China                                 | 459520 (313552–630785) | 1290810 (865894–1775731) | 62.83 (42.81–87.18)  | 67.79 (45.92–93.34)  | 0.24 (0.2–0.28)    |
| Democratic People's Republic of Korea | 7358 (4781–10363)      | 16854 (10924–23869)      | 52.96 (34.41–75.6)   | 58.18 (37.92–82.88)  | 0.3 (0.29–0.32)    |
| Taiwan (Province of China)            | 8942 (5809–12903)      | 25555 (16386–36588)      | 62.15 (40.41–88.83)  | 65.23 (42.19–92.48)  | 0.12 (0.03–0.22)   |
| <b>Oceania</b>                        |                        |                          |                      |                      |                    |
| American Samoa                        | 14 (9–19)              | 23 (15–33)               | 53.84 (34.52–76.82)  | 55.99 (36.66–78.83)  | 0.1 (0.09–0.11)    |
| Cook Islands                          | 7 (5–10)               | 14 (9–20)                | 54.69 (36.07–77.59)  | 58.49 (37.89–85.02)  | 0.21 (0.21–0.21)   |
| Fiji                                  | 192 (122–269)          | 346 (227–485)            | 49.72 (31.96–70.51)  | 51.59 (34.18–72.37)  | 0.08 (0.07–0.1)    |
| Guam                                  | 42 (28–59)             | 116 (76–165)             | 56.07 (36.48–80.07)  | 57.99 (37.52–82.28)  | 0.1 (0.08–0.13)    |
| Kiribati                              | 18 (11–25)             | 32 (21–44)               | 45.75 (29.64–64.84)  | 47.64 (31.23–66.72)  | 0.11 (0.1–0.12)    |
| Marshall Islands                      | 11 (7–15)              | 16 (10–22)               | 48.1 (31.84–68.02)   | 50.7 (33.43–71.45)   | 0.18 (0.17–0.19)   |
| Micronesia (Federated States of)      | 28 (18–39)             | 32 (21–45)               | 48.11 (30.89–68.48)  | 50.7 (32.22–71.59)   | 0.16 (0.14–0.17)   |

TableS2(continued)

|                                    |                     |                       |                      |                      |                    |
|------------------------------------|---------------------|-----------------------|----------------------|----------------------|--------------------|
| Nauru                              | 2 (2-3)             | 3 (2-4)               | 48.52 (31.53-69.67)  | 49.34 (32.03-69.23)  | 0.05 (0.01-0.09)   |
| Niue                               | 1 (1-2)             | 1 (1-1)               | 51.61 (33.5-72.91)   | 54.53 (35.8-76.11)   | 0.15 (0.15-0.16)   |
| Northern Mariana Islands           | 11 (8-16)           | 25 (16-35)            | 60 (39.07-85.1)      | 60.69 (39.98-86.18)  | -0.03 (-0.05-0.01) |
| Palau                              | 5 (3-7)             | 9 (6-14)              | 52.12 (33.53-75.33)  | 55.02 (36.11-79.58)  | 0.15 (0.14-0.16)   |
| Papua New Guinea                   | 923 (607-1277)      | 2565 (1705-3581)      | 49.44 (32.16-69.44)  | 50.96 (32.9-71.66)   | 0.06 (0.05-0.08)   |
| Samoa                              | 51 (34-72)          | 81 (54-113)           | 52.82 (33.92-75.5)   | 55.04 (36.6-78.23)   | 0.1 (0.09-0.11)    |
| Solomon Islands                    | 77 (51-109)         | 179 (119-254)         | 48.47 (31.14-68.69)  | 49.98 (32.93-69.83)  | 0.07 (0.06-0.09)   |
| Tokelau                            | 1 (0-1)             | 1 (1-1)               | 51.9 (33.15-72.74)   | 54.86 (35.4-78.42)   | 0.16 (0.15-0.17)   |
| Tonga                              | 33 (22-47)          | 48 (31-66)            | 54.9 (35.8-77.94)    | 56.47 (35.87-78.23)  | 0.07 (0.06-0.08)   |
| Tuvalu                             | 3 (2-4)             | 5 (3-7)               | 47.66 (31.07-68.31)  | 50.84 (33.35-72.49)  | 0.18 (0.17-0.2)    |
| Vanuatu                            | 36 (24-52)          | 87 (57-122)           | 49.08 (32.16-70.51)  | 49.88 (32.39-70.62)  | 0.04 (0.03-0.04)   |
| <b>Southeast Asia</b>              |                     |                       |                      |                      |                    |
| Cambodia                           | 2408 (1610-3402)    | 5769 (3752-8123)      | 46.69 (30.29-66.12)  | 50.75 (33.28-73.13)  | 0.28 (0.27-0.3)    |
| Indonesia                          | 50573 (34714-69097) | 109258 (73519-150497) | 50.66 (34.73-71.12)  | 53.75 (36.33-74.86)  | 0.17 (0.16-0.19)   |
| Lao People's Democratic Republic   | 999 (652-1402)      | 2180 (1428-3086)      | 45.48 (29.22-64.37)  | 49.49 (32.29-70.8)   | 0.28 (0.26-0.3)    |
| Malaysia                           | 5791 (3850-8053)    | 15209 (9873-21403)    | 53.73 (34.86-76.41)  | 58.43 (38.27-81.69)  | 0.28 (0.27-0.29)   |
| Maldives                           | 58 (39-81)          | 193 (130-269)         | 54.45 (35.37-78.06)  | 59.6 (39.12-83.63)   | 0.3 (0.29-0.31)    |
| Mauritius                          | 395 (260-555)       | 916 (602-1306)        | 54.56 (35.14-76.14)  | 57.89 (38.22-81.49)  | 0.15 (0.14-0.17)   |
| Myanmar                            | 10602 (6944-14862)  | 22169 (14210-31775)   | 46.78 (30.53-65.93)  | 50.4 (32.59-72.5)    | 0.27 (0.25-0.29)   |
| Philippines                        | 17243 (11773-23739) | 40972 (28166-56498)   | 51.23 (34.83-71.41)  | 52.5 (35.78-73.6)    | 0.06 (0.05-0.07)   |
| Seychelles                         | 32 (21-45)          | 56 (36-80)            | 51.61 (33.34-73.11)  | 55.65 (35.86-78.46)  | 0.25 (0.24-0.26)   |
| Sri Lanka                          | 5876 (3864-8223)    | 14326 (9256-20507)    | 54.4 (35.28-76.19)   | 59 (38.34-84.77)     | 0.29 (0.27-0.3)    |
| Thailand                           | 20029 (13117-28446) | 61732 (39162-87420)   | 58.1 (37.5-83.28)    | 63.29 (40.54-89.51)  | 0.28 (0.27-0.28)   |
| Timor-Leste                        | 160 (108-224)       | 460 (303-639)         | 48.18 (30.99-67.14)  | 51.05 (33.31-71.79)  | 0.19 (0.18-0.2)    |
| Viet Nam                           | 23668 (15934-32904) | 51877 (33818-72986)   | 53.61 (35.68-75.73)  | 59.17 (37.96-82.5)   | 0.32 (0.31-0.32)   |
| <b>Central Sub-Saharan Africa</b>  |                     |                       |                      |                      |                    |
| Angola                             | 3122 (2056-4371)    | 10586 (7118-14845)    | 65.76 (43.07-93.73)  | 70.06 (45.67-98.39)  | 0.22 (0.2-0.23)    |
| Central African Republic           | 781 (528-1085)      | 1581 (1057-2228)      | 60.68 (39.13-85.59)  | 63.19 (41.23-89.56)  | 0.13 (0.13-0.14)   |
| Congo                              | 824 (541-1153)      | 2044 (1365-2853)      | 65.48 (42.97-94.43)  | 70.66 (46.14-100.33) | 0.26 (0.24-0.27)   |
| Democratic Republic of the Congo   | 12307 (8081-17197)  | 30523 (20788-43185)   | 66.39 (42.68-95.53)  | 69.49 (44.06-98.88)  | 0.14 (0.12-0.17)   |
| Equatorial Guinea                  | 145 (95-204)        | 494 (333-698)         | 64.91 (42.5-90.83)   | 72.22 (46.31-100.76) | 0.39 (0.37-0.4)    |
| Gabon                              | 439 (288-612)       | 802 (531-1128)        | 68.32 (44.36-96.51)  | 72.57 (47.29-101.37) | 0.2 (0.19-0.21)    |
| <b>Eastern Sub-Saharan Africa</b>  |                     |                       |                      |                      |                    |
| Burundi                            | 2005 (1317-2848)    | 4513 (2975-6331)      | 70.58 (47.23-101.32) | 74.4 (48.6-104.92)   | 0.17 (0.16-0.18)   |
| Comoros                            | 181 (119-253)       | 394 (262-550)         | 75.87 (49.4-108.61)  | 78.59 (51.77-109.65) | 0.1 (0.09-0.12)    |
| Djibouti                           | 134 (90-187)        | 533 (356-731)         | 75.51 (48.2-106.89)  | 78.86 (51.13-109.85) | 0.14 (0.12-0.16)   |
| Eritrea                            | 987 (656-1376)      | 2320 (1546-3210)      | 69 (44.92-99.54)     | 72.43 (46.3-101.43)  | 0.12 (0.11-0.14)   |
| Ethiopia                           | 16798 (11246-23376) | 42424 (28657-58906)   | 69.13 (46.58-95.61)  | 77.13 (51.8-106.96)  | 0.36 (0.35-0.37)   |
| Kenya                              | 8720 (5882-12097)   | 20829 (14064-28439)   | 75.76 (51.65-104.26) | 77.4 (52.93-107.27)  | -0.38 (-0.55-0.22) |
| Madagascar                         | 4519 (2996-6240)    | 10246 (6835-14214)    | 74.55 (47.76-105.03) | 77.29 (49.57-111.78) | 0.1 (0.09-0.1)     |
| Malawi                             | 3278 (2130-4585)    | 6779 (4604-9614)      | 70.13 (45.6-98.91)   | 73.9 (48.4-104.69)   | 0.14 (0.12-0.15)   |
| Mozambique                         | 4991 (3268-6882)    | 10780 (7211-15093)    | 73.54 (47.91-104.68) | 76.72 (49.58-107.8)  | 0.09 (0.07-0.1)    |
| Rwanda                             | 2442 (1622-3420)    | 5292 (3510-7320)      | 70.85 (46.15-101.05) | 75.17 (48.92-105.18) | 0.19 (0.17-0.21)   |
| Somalia                            | 2161 (1423-3012)    | 5960 (3957-8352)      | 67.66 (43.68-96.11)  | 68.44 (45.57-96.13)  | 0.02 (0-0.03)      |
| South Sudan                        | 2232 (1461-3160)    | 3458 (2325-4806)      | 72.53 (47.46-102.95) | 75.08 (48.25-104.72) | 0.09 (0.09-0.1)    |
| Uganda                             | 5998 (3965-8418)    | 14800 (9929-20712)    | 71.75 (45.87-100.76) | 74.35 (48.25-104.31) | 0.08 (0.06-0.1)    |
| United Republic of Tanzania        | 9719 (6247-13498)   | 23751 (16069-33439)   | 73.22 (47.03-104.07) | 77.02 (50.74-107.85) | 0.37 (0.29-0.45)   |
| Zambia                             | 2564 (1681-3559)    | 6584 (4437-9320)      | 70.25 (45.44-99.5)   | 74.28 (47.9-104.77)  | 0.16 (0.14-0.19)   |
| <b>Southern Sub-Saharan Africa</b> |                     |                       |                      |                      |                    |
| Botswana                           | 474 (311-670)       | 1052 (710-1468)       | 69.42 (45.15-97.97)  | 71.4 (46.2-100.7)    | 0.08 (0.05-0.11)   |
| Eswatini                           | 258 (172-364)       | 421 (282-591)         | 66.23 (42.78-94.59)  | 68.35 (44.38-96.31)  | 0.09 (0.06-0.12)   |
| Lesotho                            | 623 (416-871)       | 738 (489-1038)        | 64.91 (42.17-93.72)  | 66.19 (42.96-92.8)   | 0.04 (0.01-0.07)   |
| Namibia                            | 541 (359-770)       | 1083 (716-1540)       | 71.05 (46.26-101.91) | 74.15 (48.65-104.65) | 0.13 (0.11-0.15)   |
| South Africa                       | 16957 (11405-23430) | 32973 (22175-45725)   | 72.53 (49.32-101.55) | 74.51 (50.7-104)     | 0.1 (0.07-0.13)    |
| Zimbabwe                           | 3553 (2341-5014)    | 5481 (3711-7762)      | 67.51 (43.54-97.02)  | 68.09 (44.59-96.88)  | -0.03 (-0.05-0)    |
| <b>Western Sub-Saharan Africa</b>  |                     |                       |                      |                      |                    |
| Benin                              | 1799 (1170-2544)    | 4827 (3299-6612)      | 68.25 (44.55-96.88)  | 71.57 (46.93-100.05) | 0.14 (0.13-0.15)   |
| Burkina Faso                       | 3338 (2214-4741)    | 7934 (5329-11145)     | 65.31 (42.85-93.47)  | 67.99 (44.23-95.99)  | 0.14 (0.12-0.15)   |
| Cabo Verde                         | 219 (145-308)       | 365 (242-512)         | 78.1 (51.43-111.42)  | 82.84 (54.27-117.43) | 0.2 (0.18-0.22)    |
| Cameroon                           | 3645 (2450-5122)    | 11276 (7547-15760)    | 67.47 (43.67-96.82)  | 72.42 (47.33-102.2)  | 0.21 (0.19-0.22)   |
| Chad                               | 2256 (1492-3185)    | 5565 (3747-7787)      | 65.54 (43.1-93.59)   | 68.89 (45.23-96.67)  | 0.17 (0.15-0.18)   |
| Côte d'Ivoire                      | 3637 (2446-5060)    | 9782 (6641-13706)     | 67.77 (43.77-97.12)  | 71.82 (46.82-99.94)  | 0.19 (0.17-0.21)   |
| Gambia                             | 334 (221-468)       | 914 (609-1266)        | 69.53 (45.89-99.5)   | 72.96 (47.71-102.64) | 0.16 (0.15-0.17)   |
| Ghana                              | 5110 (3398-7044)    | 13246 (8773-18468)    | 66.32 (42.91-93.47)  | 69.84 (44.56-98.15)  | 0.15 (0.14-0.16)   |
| Guinea                             | 2479 (1629-3463)    | 4883 (3187-6757)      | 66.39 (43-94.38)     | 69.8 (45.17-97.12)   | 0.15 (0.14-0.16)   |
| Guinea-Bissau                      | 310 (205-428)       | 618 (418-875)         | 63.47 (41.17-89.92)  | 67.28 (44.55-96.65)  | 0.2 (0.18-0.21)    |
| Liberia                            | 937 (614-1315)      | 1890 (1245-2623)      | 67.56 (43.78-96.39)  | 72.38 (47.23-101.79) | 0.22 (0.22-0.23)   |
| Mali                               | 2989 (1985-4167)    | 7970 (5366-11354)     | 66 (41.99-93.82)     | 70.04 (46.14-99.45)  | 0.18 (0.17-0.19)   |
| Mauritania                         | 863 (579-1233)      | 1966 (1311-2751)      | 70.81 (46.78-99.58)  | 76.3 (49.65-107.17)  | 0.25 (0.23-0.26)   |
| Niger                              | 2395 (1627-3347)    | 7813 (5310-11067)     | 66.35 (43.38-94.84)  | 69.82 (45.84-98.36)  | 0.18 (0.16-0.19)   |
| Nigeria                            | 37265 (25062-51438) | 87006 (58958-120221)  | 71.76 (48.87-99.94)  | 74.68 (50.5-103.7)   | 0.1 (0.08-0.12)    |
| Sao Tome and Principe              | 55 (37-78)          | 95 (64-135)           | 70.87 (45.84-101.35) | 76.16 (49.32-106.7)  | 0.23 (0.22-0.24)   |
| Senegal                            | 2897 (1919-4109)    | 6698 (4450-9333)      | 70.41 (46.34-99.02)  | 74.26 (48.14-104.01) | 0.15 (0.14-0.16)   |
| Sierra Leone                       | 1628 (1084-2330)    | 3243 (2171-4526)      | 67.27 (44.13-96.95)  | 71.3 (47.28-99.77)   | 0.17 (0.16-0.18)   |
| Togo                               | 1156 (780-1609)     | 3076 (2068-4240)      | 68.03 (43.93-96.22)  | 71.36 (46.58-99.2)   | 0.14 (0.13-0.15)   |

<sup>1</sup> Color intensity represents value magnitude. Red indicates positive values, darker for larger. Blue indicates negative values, darker for more negative.

**Abbreviations:** YLDs, years lived with disability; ASYR, Age-standardised YLDs rate(per 100,000 population); UI, uncertainty interval; EAPC, estimated annual percentage change; CI, confidence interval; SDI, Socio-demographic Index.
